# Supplementary material for: Barley sodium content is regulated by natural variants of the Na+ transporter HvHKT1;5
Source: PubMed Central journal article supplement (PMC7244711; doi:10.1038/s42003-020-0990-5), 2020-05-22
Supplement: 42003_2020_990_MOESM1_ESM.pdf [file 42003_2020_990_MOESM1_ESM.pdf]

## Supplementary Information: Natural variants of *HvHKT1;5* regulate sodium content in barley.

### Supplementary Figures.

**Supplementary Figure 1. Current-voltage (I/V) curve of *X. laevis* oocytes expressing allelic variants of *HvHKT1;5*.** **A**, High Na<sup>+</sup> allele *HvHKT1;5N57S*. **B**, High Na<sup>+</sup> allele *HvHKT1;5V416I*. **C**, High Na<sup>+</sup> allele *HvHKT1;5S438N*. **D**, Low Na<sup>+</sup> allele *HvHKT1;5I416V*. **E**, Low Na<sup>+</sup> allele Viivi (Na<sup>+</sup><sub>HAP2</sub>). Currents were recorded in 1 mM, 30 mM of Na<sup>+</sup> or 30 mM K<sup>+</sup> glutamate; data represented in mean ± SEM. n= 3-6.

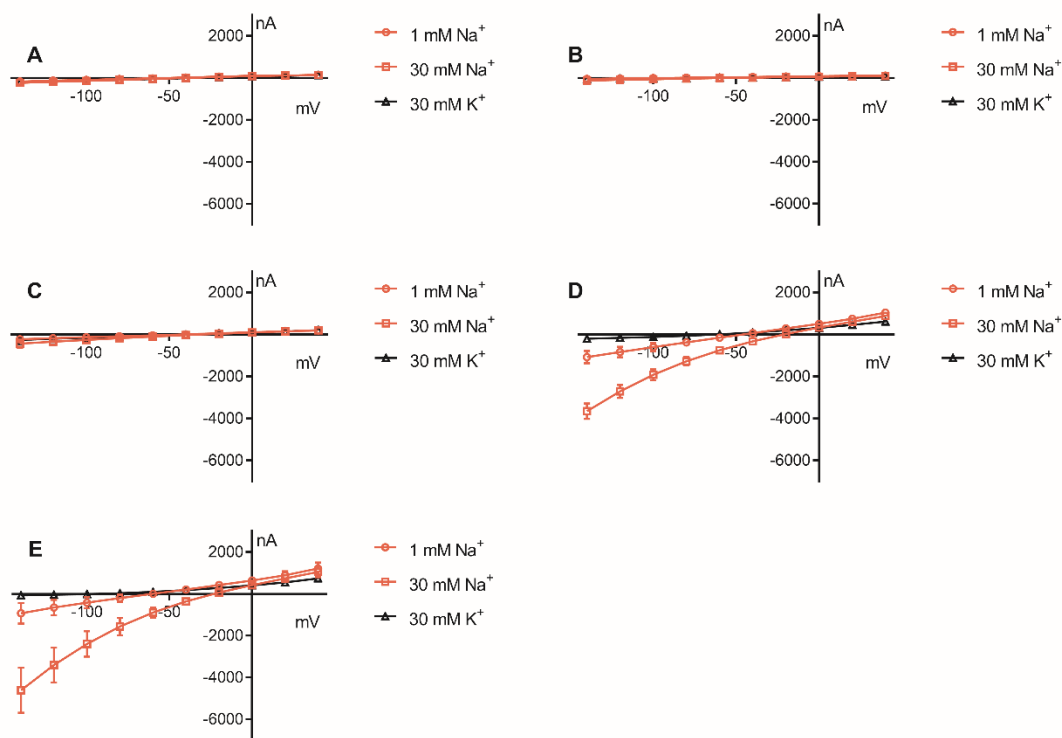

**Supplementary Figure 2: Molecular models of HvHKT1;5<sub>HAP3\_L189</sub> and HvHKT1;5<sub>HAP3\_P189</sub> transporters in complex with Na<sup>+</sup>.** **a., b.** Cartoon representations of HvHKT1;5<sub>HAP3\_L189</sub> (left, grey) and HvHKT1;5<sub>HAP3\_P189</sub> (right, deep teal) with cylindrical  $\alpha$ -helices illustrate 3D folds. Constrictions in selectivity filters are bound by four residues (cpk magenta sticks, regular types) that contain Na<sup>+</sup> (violet spheres). Black arrows illustrate directional flows of Na<sup>+</sup> that are likely to enter the permeation trajectory by-passing selectivity filter constrictions. Variant residues N57, V416, S438 and L189 (cpk sticks and dots) in HvHKT1;5<sub>HAP3\_L189</sub>, and N57, V416 and S438 and P189 (cpk sticks and dots) in HvHKT1;5<sub>HAP3\_P189</sub> are indicated; the dots illustrate volumes of van der Waals radii. Four variations N57, V416 and S438 (regular types), and L189 or P189 (bold types) are shown in HvHKT1;5<sub>HAP3</sub> proteins, from which P189 is deemed to be critical for protein structure that underlies function. **c., d.** Detailed views of  $\alpha$ -helices, which neighbour constrictions of selectivity filters containing Na<sup>+</sup> that are crucial for permeation function. Na<sup>+</sup> (violet spheres) are located near the selectivity filter residues S76, G232, G351, G451 (cpk magenta sticks) in HvHKT1;5<sub>HAP3</sub> structures. In each protein, polar contacts of L189 and P189 (shown in cpk sticks and dots), that are positioned on  $\alpha$ -helix 4, are indicated by dashed lines at separations between 2.5 Å and 3.1 Å. Notably, leucine or proline residues in HvHKT1;5<sub>HAP3</sub> structures effect packing angles of bordering  $\alpha$ -helices 4 and 5. This packing angle between  $\alpha$ -helices 4 and 5 in HvHKT1;5<sub>HAP3\_P189</sub> is more obtuse (two black arrows pointing to each other).

Supplementary Figure 2

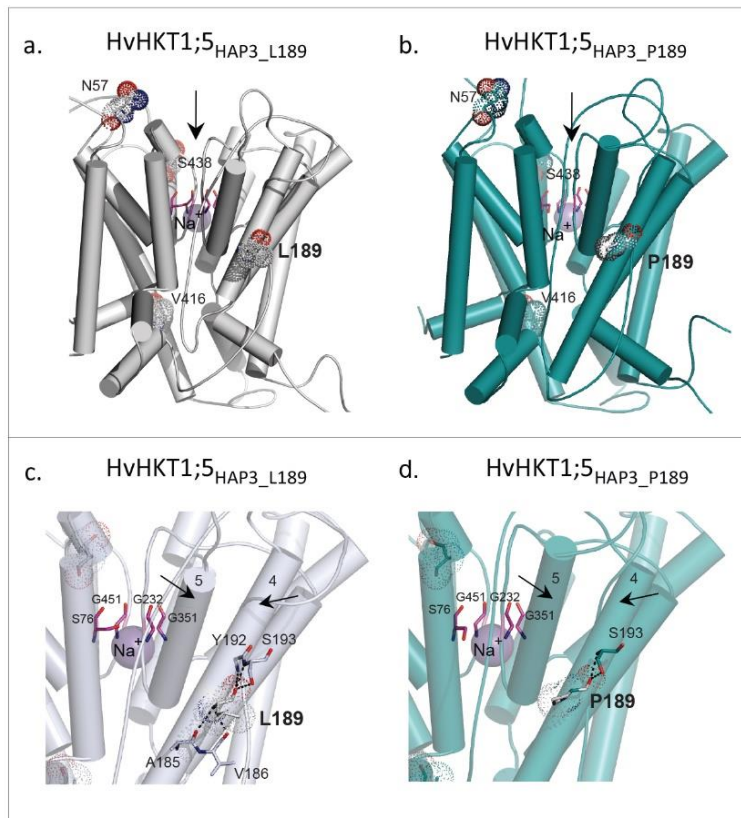

## Supplementary Figure 2 Methods.

The most suitable template for HvHKT1;5 transporter proteins was the *B. subtilis* KtrB K<sup>+</sup> transporter (Protein Data Bank accession 4J7C, chain I) (Vieira-Pires *et al.*, 2013) as previously identified (Xu *et al.*, 2018). In KtrB, K<sup>+</sup> was substituted by Na<sup>+</sup> during modelling of all HKT1;5 proteins. 3D models of HvHKT1;5<sub>HAP3\_L189</sub> and HvHKT1;5<sub>HAP3\_P189</sub> in complex with Na<sup>+</sup> were generated in Modeller 9v19 (Sali and Blundell, 1993) as described previously (Cotsaftis *et al.*, 2012, Waters *et al.*, 2013) incorporating Na<sup>+</sup> ionic radii (Xu *et al.*, 2018) taken from the CHARMM force field (Brooks *et al.*, 2009), on the Linux station running the Ubuntu 12.04 operating system. Best scoring models (from an ensemble of 50) were selected based on the combination of Modeller Objective Function (Shen and Sali, 2006), Discrete Optimised Protein Energy term (Eswar *et al.*, 2008), PROCHECK (Laskowski *et al.*, 1993), ProSa 2003 (Sippl, 1993) and FoldX (Schymkowitz *et al.*, 2005). Structural images were generated in the PyMOL Molecular Graphics System V1.8.2.0 (Schrödinger LLC, Portland, OR, USA). Calculations of angles between selected  $\alpha$ -helices in HvHKT1;5 models were executed in Chimera (Pettersen *et al.*, 2004) and evaluations of differences ( $\Delta\Delta G = \Delta G_{mut} - \Delta G_{wt}$ ) in Gibbs free energies was performed with FoldX (Schymkowitz *et al.*, 2005). Sequence conservation patterns were analysed with ConSurf (Landau *et al.*, 2005; Celniker *et al.*, 2013) based on 3D models of HvHKT1;5 transporters.

Evaluations of stereo-chemical parameters indicated that the template and HvHKT1;5 models had satisfactory parameters as indicated by Ramachandran plots with two residues positioned in disallowed regions, corresponding to 0.5% of all residues, except of G and P. Average G-factors (measures of correctness of dihedral angles and main-chain covalent bonds) of the template, and the HvHKT1;5<sub>HAP3\_L189</sub> and HvHKT1;5<sub>HAP3\_P189</sub> models, calculated by PROCHECK (0.06, -0.07 and -0.21, respectively), and ProSa 2003 z-scores (measures of C $\beta$ -C $\beta$  pair interactions of -9.0, -5.6 and -6.5, respectively), indicated that template and modelled structures had favourable conformational energies.

## Results and Discussion

1. Positional sequence identities between template and target sequences are in the twilight zone (20.6% and 20.4% between the template and HvHKT1;5<sub>HAP3\_L189</sub> and HvHKT1;5<sub>HAP3\_P189</sub> sequences, respectively), emphasising the difficulty of comparative modelling. This indicated that the attention must be paid to sequence alignments to be able to compare 3D models at the structural levels. Three types of alignments were generated, using Muscle (Edgar *et al.*, 2004), MUSTER (Wu and Zhang, 2007) and LOMETS (Wu and Zhang, 2008) algorithms. Input alignments for 3D modelling were generated by the combination of all alignments and secondary structure elements analyses using PsiPred (Buchan *et al.*, 2013), followed by manual adjustments to optimise positions of gaps in alignments.
2. 3D modelling revealed that overall 3D folds were similar, where selectivity filter constrictions carry one serine and three glycine residues, in accordance with their Na<sup>+</sup> ion conductivity (Supplementary Figure 2).
3. Detailed analysis of environments around  $\alpha$ -helix 4 and  $\alpha$ -helix 5 (two black arrows pointing to each other in Supplementary Figure 2) revealed that L189 in  $\alpha$ -helix 4 of

HvHKT1;5<sub>HAP3\_L189</sub> established four polar contacts at separations between 2.7 Å to 3.1 Å with A185, V186, Y192 and S193 neighbouring residues.

4. These extensive polar contacts were not formed in the HvHKT1;5<sub>HAP3\_P189</sub> variant which only established two polar contacts at separations between 2.5 Å to 2.7 Å with S193. The lack of these cooperative binding networks in  $\alpha$ -helix 4 around P189, and tight separations may impose severe structural rigidity on 3D folds HvHKT1;5<sub>HAP3\_P189</sub>. These  $\alpha$ -helices might no longer properly function in the structural and functional context to ensure Na<sup>+</sup> ion conductance.

5. In HvHKT1;5<sub>HAP3\_L189</sub>, the packing angle between  $\alpha$ -helix 4 and  $\alpha$ -helix 5 (two black arrows pointing to each other in Supplementary Figure 2) is 9° sharper compared to that in HvHKT1;5<sub>HAP3\_P189</sub> indicating that proline positions affect packing of  $\alpha$ -helices in the specific 3D environments of HvHKT1;5 transporters. These changes in structural packing most likely contribute significantly to the structural rigidity and the lack of dynamics in 3D folds during transport.

6. Evaluations of differences of Gibbs free energies of HvHKT1;5<sub>HAP3</sub> transporters revealed that the L189P mutation was energetically highly unfavourable (highly destabilising), and that the reverse mutation (P189 into L189) restored 100% of this energy loss, as expected.

7. In HvHKT1;5<sub>HAP3</sub> transporters the differences in Gibbs free energies ( $\Delta\Delta G$ ) between the P189L variant and the reverse mutation (L189P) were mildly destabilising and similar in both directions, suggesting that the environment of P189 has somewhat adapted to its 3D fold, thus a low level of conductance of Na<sup>+</sup> could be observed in HvHKT1;5<sub>HAP3\_P189</sub>.

8. In HvHKT1;5<sub>HAP3</sub> we identified a positive correlation between structural characteristics of  $\alpha$ -helix 4/ $\alpha$ -helix 5 (trends in angles based on  $\alpha$ -helical planes), differences in Gibbs free energies of forward (P189L) and reverse (L189P) mutations, and the ability to conduct Na<sup>+</sup>. This correlation shows that in barley HvHKT1;5 transporters, conservation and variability of specific residues reflect profoundly on the transport function.

9. Sequence conservation patterns, based on 3D models of HvHKT1;5<sub>HAP3</sub> using 368-370 sequences at sequence identities of 30% and higher (specifications: HMMER homolog search algorithm, UNIREF-90 Protein database with the E-value cutoff of  $1 \cdot 10^{-4}$ , Bayesian Model of substitution for proteins), revealed that the P189 variation occurred only in barley.

10. There are four variations (N57, P189, V416 and S438) in HvHKT1;5<sub>HAP3</sub> compared to HvHKT1;5<sub>HAP1</sub> that represent 15 testable combinations. Not all of them could be tested for transport function. We suggest that three variations (N57, V416, S438) between HvHKT1;5<sub>HAP3</sub> and HvHKT1;5<sub>HAP1</sub> would have a lesser impact on Na<sup>+</sup> conductivity. This is supported by conservation patterns analyses showing that these residues could be substituted by a variety of (mostly hydrophilic) residues, namely to R, S, A, P, G, L, H, D, Y, V, N, T, E, I (for N57), F, L, I, A, T, V (for V416), and N, T, Y, K, Q, S, R, H, A, P (for S438).

## References

Brooks BR, Brooks CL 3rd, Mackerell AD Jr, Nilsson L, Petrella RJ, Roux B, Won Y, Archontis G, Bartels C, Boresch S, Caflisch A, Caves L, Cui Q, Dinner AR, Feig M, Fischer S, Gao J, Hodoscek M, Im W, Kuczera K, Lazaridis T, Ma J, Ovchinnikov V, Paci E, Pastor RW, Post CB, Pu JZ, Schaefer M,

Tidor B, Venable RM, Woodcock HL, Wu X, Yang W, York DM, Karplus M (2009) CHARMM: The Biomolecular Simulation Program. *J Comp Chem* 30, 1545-1615.

Buchan DWA, Minneci F, Nugent TCO, Bryson K, Jones DT (2013) Scalable web services for the PSIPRED protein analysis workbench. *Nucleic Acids Res* 41, W340-W348.

Celniker G, Nimrod G, Ashkenazy H, Glaser F, Martz E, Mayrose I, Pupko T, Ben-Tal N (2013) ConSurf: using evolutionary data to raise testable hypotheses about protein function. *Isr J Chem* 53, 199-206

Cotsaftis O, Plett D, Shirley N, Tester M, Hrmova M (2012) A two-staged model of Na<sup>+</sup> exclusion in rice explained by 3D modeling of HKT transporters and alternative splicing. *PLoS ONE* 7, e39865.

Edgar RC (2004) MUSCLE: multiple sequence alignment with high accuracy and high throughput. *Nucleic Acids Res* 32,1792–1797.

Eswar N, Eramian D, Webb B, Shen MY, Sali A (2008) Protein structure modeling with Modeller, In: Kobe B, Guss M, Huber T (eds) *Structural Proteomics*. Meth Mol Biol, vol 426. Humana Press.

Landau M, Mayrose I, Rosenberg Y, Glaser F, Martz E, Pupko T, Ben-Tal N (2005) ConSurf 2005: the projection of evolutionary conservation scores of residues on protein structures. *Nucleic Acids Res* 33, W299-W302.

Laskowski, RA, MW MacArthur, DS Moss, JM Thornton (1993) PROCHECK: a program to check the stereochemical quality of protein structures. *J App Crystall* 26, 283-291.

Pettersen, EF, Goddard TD, Huang CC, Couch GS, Greenblatt DM, Meng EC, Ferrin TE (2004) UCSF Chimera - A Visualization System for Exploratory Research and Analysis. *J Comput Chem* 25, 1605-1612.

Sali A, Blundell T (1993) Comparative protein modeling by satisfaction of spatial restraints. *J Mol Biol* 234, 779-815.

Schymkowitz JWH, F Rousseau, IC Martins, J Ferkinghoff-Borg, F Stricher, Serrano L (2005) Prediction of water and metal binding sites and their affinities by using the Fold-X force field. *Proceed Natl Acad Sci USA* 102, 10147-10152.

Shen, MY, Sali A (2006) Statistical potential for assessment and prediction of protein structures. *Protein Sci* 15, 2507-2524.

Sippl MJ (1993) Recognition of errors in three-dimensional structures of proteins. *Proteins* 17, 355-362.

Vieira-Pires RS, Szollosi A, Morais-Cabral JH (2013) The structure of the KtrAB potassium transporter. *Nature* 496, 323-328.

Waters S, Gilliam M, Hrmova M (2013) Plant high affinity potassium (HKT) transporters involved in salinity tolerance: structural insights to probe differences in ion selectivity. *Int J Mol Sci* 14, 7660-7680.

Xu B, Waters S, Byrt CS, Plett D, Tyerman SD, Tester M, Munns R, Hrmova M, Gilliam M (2018) Structural variations in wheat HKT1;5 underpin differences in Na<sup>+</sup> transport capacity. *Cell Mol Life Sci* 75, 1133-1144.

Wu S, Zhang Y (2007) LOMETS: A local meta-threading-server for protein structure prediction. *Nucleic Acids Res* 35, 3375-3382

Wu S, Zhang Y (2008) MUSTER: Improving protein sequence profile-profile alignments by using multiple sources of structure information. *Proteins* 72, 547-556.

**Supplementary Figure 3: Influence of L189P polymorphism in HvHKT1;5 on grain K<sup>+</sup> accumulation.** Mature grain K<sup>+</sup> content after barley accessions were exposed to different levels of NaCl at the fourth leaf stage of development. For boxplots the horizontal bar of the boxplot shows the median, the box delineates the first and third quartile, and the whiskers show  $\pm 1.5 \times$  IQR. White bars indicate 0mM of NaCl, light grey bars indicate 150mM NaCl, and dark grey indicates 250mM NaCl added to plants.

Supplementary Figure 3

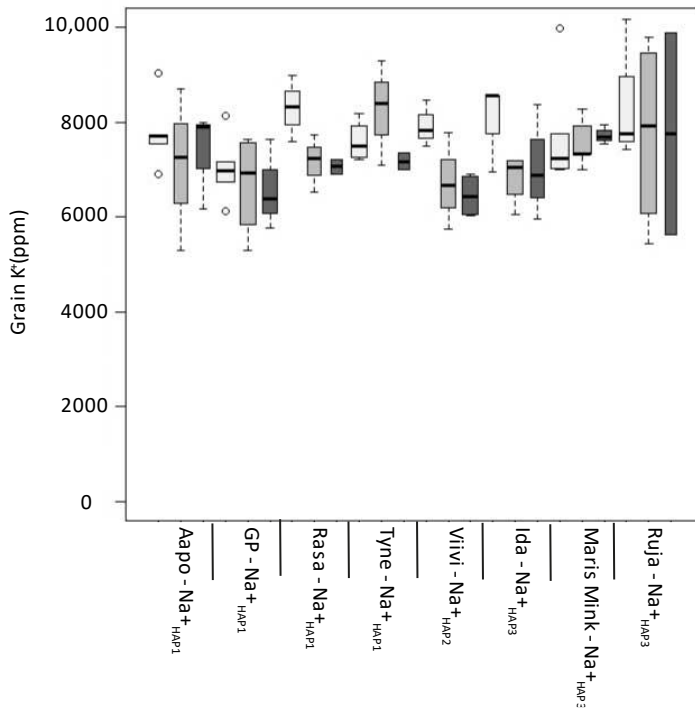

**Supplementary Figure 4: Influence of L189P polymorphism in HvHKT1;5 on shoot Na<sup>+</sup> accumulation.** Fifth leaf Na<sup>+</sup> content after barley accessions were exposed to different levels of NaCl at the fourth leaf stage of development. For boxplots the horizontal bar of the boxplot shows the median, the box delineates the first and third quartile, and the whiskers show  $\pm 1.5 \times$  IQR. White bars indicate 0mM of NaCl, light grey bars indicate 150mM NaCl, and dark grey indicates 250mM NaCl added to plants.

Supplementary Figure 4

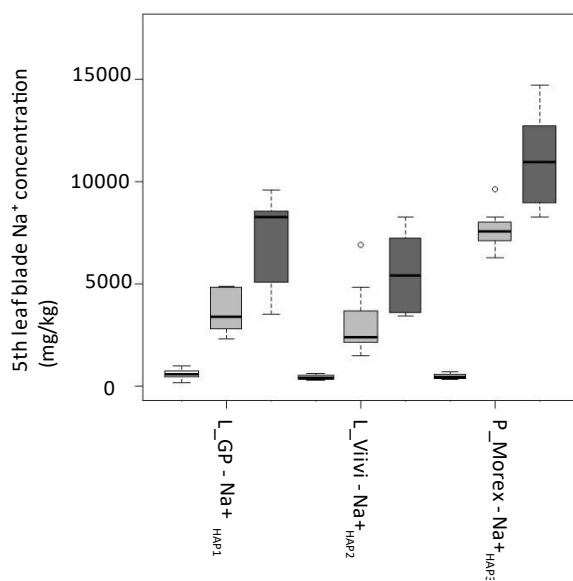



# Supplementary Figure 5: Multiple alignment of species HKT orthologues

Supplementary Figure 5

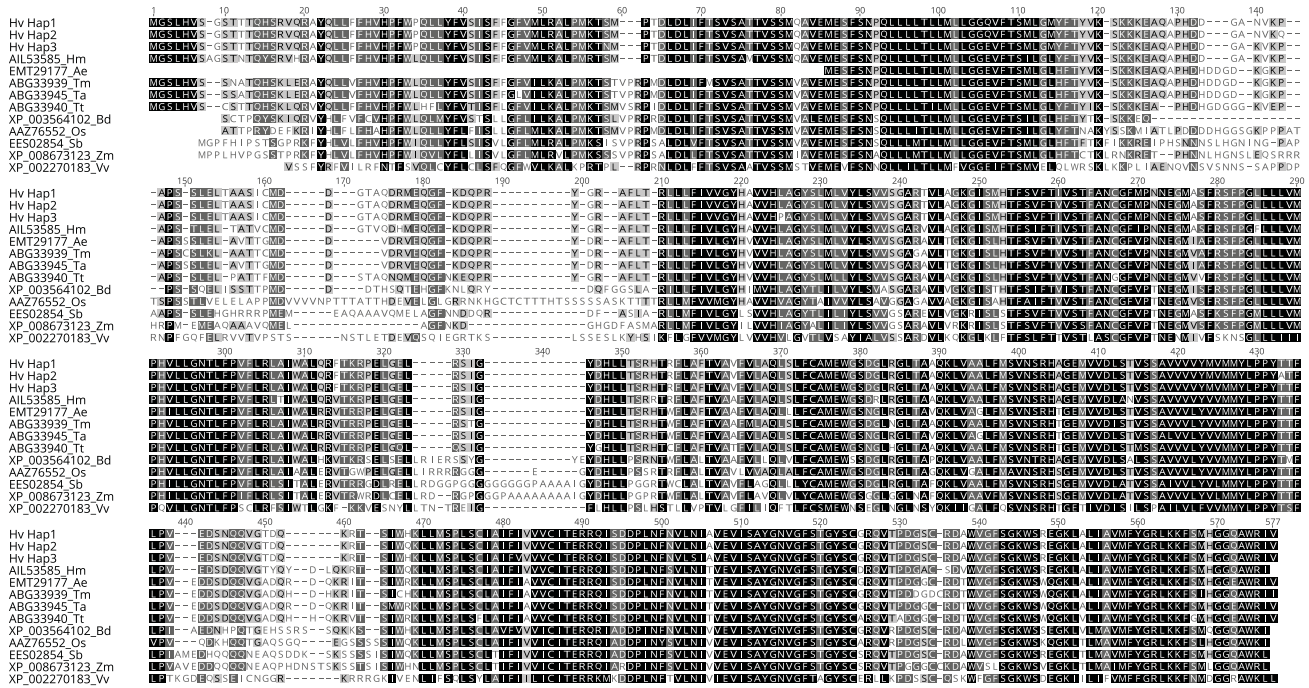

## Supplementary Figure 6: Geographical distribution of L189P in barley germplasm.

**a.** Geographical distribution of L189P in *HvHKT1;5* in *H. spontaneum*. Location of accessions containing L189 in blue and 189P in red. **b.** Geographical distribution of L189P in *HvHKT1;5* in *H. vulgare landraces*. Location of accessions containing L189 in blue ( $\text{Na}^+_{\text{HAP1}}$ ,  $\text{Na}^+_{\text{HAP2}}$ ) and 189P in red ( $\text{Na}^+_{\text{HAP3}}$ ).

Supplementary Figure 6

A.

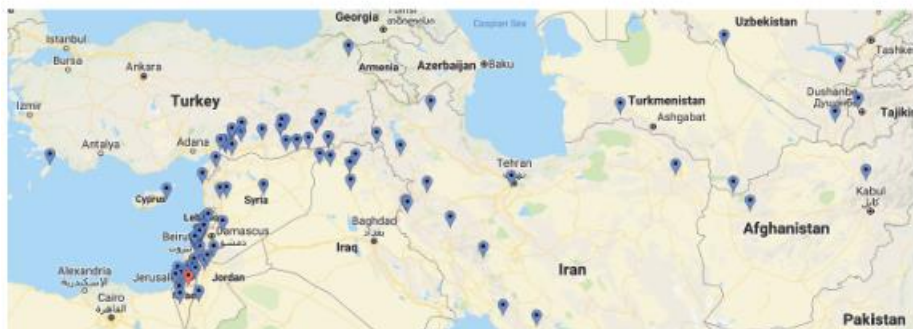

B.

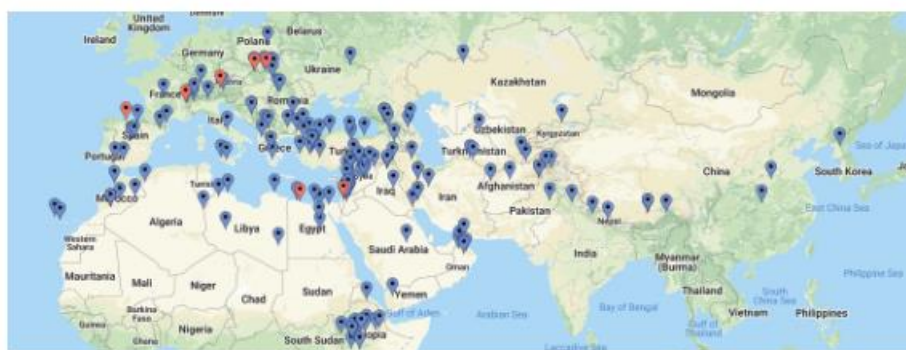

**Supplementary Figure 7.** Distribution of *HvHKT1;5* haplotypes in different gene pools. **A.** Maximum likelihood tree of the coding sequence of *HvHKT1;5* in 73 *H. spontaneum*, including the 3 alleles of *HvHKT1;5*,  $\text{Na}^+_{\text{HAP1}}$ ,  $\text{Na}^+_{\text{HAP2}}$  and  $\text{Na}^+_{\text{HAP3}}$ , identified in our analysis of elite 2-row spring barleys for reference. Colours highlight separate clades, red corresponding to the clade containing the accession representing the high sodium allele from the elite cultivars ( $\text{Na}^+_{\text{HAP3}}$ ), dark blue the low grain sodium allele ( $\text{Na}^+_{\text{HAP1}}$ ), and light blue representing the other low grain sodium allele from the elite cultivars ( $\text{Na}^+_{\text{HAP2}}$ ). Branches representing the three haplotypes are indicated with their haplotype number and \* represents FT064 which shares the same haplotype as HAP\_3. **B.** Maximum likelihood tree using 4000 SNPs selected randomly from across the genome of *H. spontaneum* landraces, accessions containing L189 are in blue and 189P in red. **C.** Maximum likelihood tree using 4000 SNPs selected randomly from across the genome of *H. vulgare* landraces, accessions containing L189 are in blue and 189P in red. **D.** Maximum likelihood tree using 4000 SNPs selected randomly from across the genome of *H. vulgare* cultivars, accessions containing L189 are in blue and 189P in red. Bootstrap values are included.

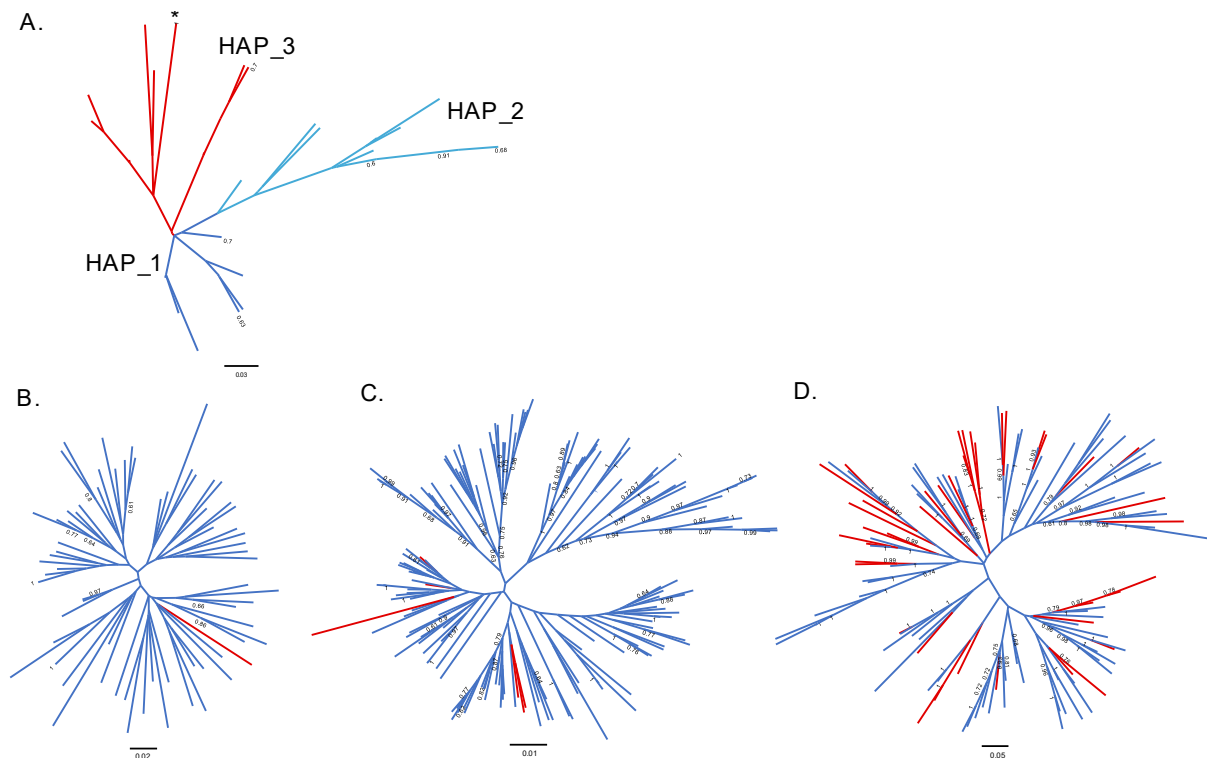

## **Supplementary Tables**

**Supplementary Table 1:** Elite 2-row spring cultivars included in GWAS and sequenced for *HvHKT1:5*

| Accession | Na23  | K39  | NCBI ref |
|-----------|-------|------|----------|
| AAPO      | 34.31 | 4796 | MT312248 |
| ACAPELLA  | 25.57 | 3464 | MT312248 |
| ADONIS    | 26.89 | 4535 | MT312248 |
| AGENDA    | 26.71 | 4691 | MT312248 |
| AKITA     | 29.41 | 3775 | n.a      |
| ALLIOT    | 41.76 | 4475 | MT312248 |
| AMOURETTE | 27.96 | 4792 | MT312248 |
| ANACONDA  | 35.98 | 4560 | MT312248 |
| ANAI      | 26.66 | 4397 | MT312248 |
| ANNABELL  | 20.9  | 4596 | MT312248 |
| APPALOOSA | 70.94 | 4478 | MT312250 |
| ARDILA    | 24.59 | 4164 | MT312248 |
| ASTORIA   | 40.29 | 4676 | MT312248 |
| ATHENA    | 23.28 | 4324 | MT312248 |
| ATHOS     | 42.12 | 4362 | MT312248 |
| AVEC      | 16.07 | 3525 | MT312248 |
| BARKE     | 45.98 | 4742 | MT312250 |
| BARONESSE | 48.2  | 4890 | MT312248 |
| BERWICK   | 33.66 | 4537 | MT312248 |
| BERYLLIUM | 48.17 | 4553 | MT312250 |
| BLenheim  | 37.04 | 4498 | MT312248 |
| BRAEMAR   | 29.01 | 4493 | n.a      |
| BRAHMS    | 38.04 | 3349 | MT312250 |
| BRAZIL    | 35.44 | 4641 | MT312250 |
| CALICO    | 69.23 | 4430 | MT312250 |
| CAMPALA   | 46.13 | 4529 | MT312250 |
| CATALINA  | 43.9  | 4128 | MT312250 |
| CELLAR    | 17.58 | 3350 | MT312248 |
| CHARIOT   | 24.22 | 4164 | MT312248 |
| CHIEFTAN  | 33.04 | 4261 | MT312248 |
| CHIME     | 41.87 | 4375 | MT312250 |
| CLARITY   | 23.47 | 3938 | MT312248 |
| CLASS     | 23.37 | 4179 | n.a      |
| CLEOPATRA | 21.22 | 4113 | n.a      |
| COLADA    | 36.07 | 4725 | MT312248 |
| COOPER    | 45.27 | 4167 | MT312250 |
| CROYDON   | 20.92 | 3963 | MT312249 |
| CRUSADER  | 47.65 | 4360 | MT312250 |
| DANUTA    | 24.26 | 4780 | MT312248 |

| Accession | Na23  | K39  | NCBI ref |
|-----------|-------|------|----------|
| DELIBES   | 40.74 | 4734 | MT312250 |
| DERKADO   | 23.56 | 3400 | MT312248 |
| DEW       | 28.53 | 4297 | MT312248 |
| DRAUGHT   | 21.83 | 4324 | MT312248 |
| DRUM      | 33.49 | 4644 | MT312248 |
| EXTRACT   | 49.11 | 4400 | MT312250 |
| FAIRYTALE | 28.86 | 4750 | MT312248 |
| FELICIE   | 29.77 | 4131 | MT312248 |
| FOXTROT   | 26.93 | 4319 | MT312248 |
| FRANKLIN  | 37.77 | 4745 | MT312248 |
| GLOBAL    | 17.65 | 3341 | MT312248 |
| GOLDIE    | 17.71 | 3464 | MT312248 |
| GRANTA    | 54.29 | 4397 | MT312250 |
| GUNDEL    | 48.49 | 4454 | MT312250 |
| HART      | 48.09 | 4483 | MT312250 |
| HASSAN    | 29.11 | 4110 | MT312248 |
| HEATHER   | 50.34 | 4327 | MT312250 |
| HELMI     | 38.85 | 4609 | MT312250 |
| HERIS     | 20.12 | 4240 | MT312248 |
| HERON     | 32.24 | 4377 | MT312248 |
| HOPPER    | 26.23 | 4304 | MT312248 |
| HORIZON   | 27.84 | 4694 | MT312248 |
| HOST      | 21    | 4200 | MT312248 |
| IDA       | 59.15 | 4003 | MT312250 |
| INDOLA    | 19.11 | 3349 | MT312248 |
| ISABELLA  | 33.46 | 4657 | MT312248 |
| JIVE      | 25.79 | 4309 | n.a      |
| KEOPS     | 31.3  | 4606 | MT312248 |
| KLAXON    | 43.72 | 4615 | MT312248 |
| KRISTAPS  | 20.3  | 2957 | MT312248 |
| LINDEN    | 27.76 | 4327 | MT312248 |
| LITHIUM   | 52.07 | 4718 | MT312250 |
| LIVET     | 27.05 | 4292 | MT312248 |
| MACAW     | 51.53 | 4631 | n.a      |
| MADRAS    | 44.18 | 4504 | MT312250 |
| MARISMINK | 83.79 | 4761 | MT312250 |
| MAYPOLE   | 69.63 | 4437 | n.a      |
| MELITTA   | 20.51 | 4095 | MT312248 |
| MIKADO    | 34.15 | 4142 | MT312250 |
| MINSTREL  | 30.59 | 4598 | MT312248 |
| NERUDA    | 32.84 | 4872 | MT312248 |



| Accession  | Na23  | K39  | NCBI ref |
|------------|-------|------|----------|
| NIMBUS     | 61.23 | 3487 | MT312250 |
| NOVELLO    | 22.42 | 4292 | MT312248 |
| OPTIC      | 16.62 | 4211 | n.a      |
| PENTHOUSE  | 27.74 | 4298 | n.a      |
| PEWTER     | 30.06 | 4445 | MT312248 |
| PITCHER    | 18.08 | 3971 | MT312248 |
| PONGO      | 47.51 | 4909 | MT312250 |
| PRIMERA    | 36.5  | 2693 | MT312250 |
| QUARTET    | 28.36 | 3922 | MT312250 |
| QUENCH     | 30.54 | 5089 | MT312248 |
| RAGTIME    | 24.45 | 4329 | MT312248 |
| RAINBOW    | 26.58 | 4584 | MT312248 |
| RAKAIA     | 43.05 | 4712 | MT312248 |
| RASA       | 20.15 | 3364 | MT312248 |
| RIVIERA    | 36.58 | 4264 | MT312248 |
| ROXANA     | 40.46 | 4404 | MT312250 |
| RUJA       | 46.97 | 4515 | MT312250 |
| RUMMY      | 20.48 | 4522 | MT312248 |
| SALKA      | 41.74 | 5142 | MT312248 |
| SALOON     | 72.64 | 5562 | MT312250 |
| SCANDIUM   | 68.29 | 4862 | MT312250 |
| SEBASTIAN  | 32.33 | 5175 | MT312248 |
| SIMBA      | 38.91 | 5398 | MT312248 |
| SKITTLE    | 20.44 | 4394 | MT312248 |
| SPIRAL     | 29.19 | 4606 | MT312249 |
| STARLIGHT  | 20.27 | 4373 | MT312248 |
| STATIC     | 24.64 | 4578 | MT312248 |
| SW_MACSENA | 27.2  | 3560 | MT312250 |
| SW_STELLA  | 31.16 | 2459 | MT312248 |
| TABORA     | 43.95 | 4131 | MT312250 |
| TANKARD    | 22.91 | 4264 | MT312248 |
| TAPHOUSE   | 98.76 | 4803 | MT312250 |
| TARTAN     | 31.77 | 4512 | MT312248 |
| THISTLE    | 50.34 | 4758 | MT312250 |
| THRIFT     | 56.95 | 3963 | MT312250 |
| TOBY       | 47.06 | 3412 | MT312248 |
| TRINIDAD   | 78.77 | 4655 | MT312250 |
| TROON      | 31.91 | 4936 | MT312248 |
| TUCSON     | 30.82 | 4955 | MT312248 |
| TURNBERRY  | 65.93 | 4630 | MT312250 |
| TYNE       | 18.76 | 2643 | MT312248 |

| Accession | Na23  | K39  | NCBI ref |
|-----------|-------|------|----------|
| URSA      | 23.18 | 4236 | n.a      |
| VANKKURI  | 34.44 | 4508 | MT312248 |
| VELVET    | 26.61 | 4698 | MT312248 |
| VIIVI     | 16.4  | 4303 | MT312249 |
| VISKOSA   | 19.58 | 4956 | MT312248 |
| WAGGON    | 27.8  | 5043 | MT312248 |
| WEITOR    | 44.01 | 4466 | MT312250 |
| WICKET    | 68.25 | 4687 | MT312250 |
| WREN      | 43.05 | 3554 | MT312250 |



**Supplementary Table 2:** Gene models in region identified on 4H as being significantly associated with grain Na<sup>+</sup> content.

| Gene Name          | AGP Start | AGP End   | Annotation                                                                                |
|--------------------|-----------|-----------|-------------------------------------------------------------------------------------------|
| HORVU4Hr1G087780.1 | 638223190 | 638224749 | Bifunctional inhibitor/lipid-transfer protein/seed storage 2S albumin superfamily protein |
| HORVU4Hr1G087790.2 | 638223460 | 638224442 | undescribed protein                                                                       |
| HORVU4Hr1G087800.1 | 638256143 | 638257008 | Bifunctional inhibitor/lipid-transfer protein/seed storage 2S albumin superfamily protein |
| HORVU4Hr1G087810.1 | 638307473 | 638308181 | undescribed protein                                                                       |
| HORVU4Hr1G087820.1 | 638308517 | 638309341 | undescribed protein                                                                       |
| HORVU4Hr1G087830.1 | 638309936 | 638310439 | unknown function                                                                          |
| HORVU4Hr1G087840.3 | 638318732 | 638319925 | Protein of unknown function (DUF1218)                                                     |
| HORVU4Hr1G087850.1 | 638333457 | 638333868 | 60S ribosomal protein L27-3                                                               |
| HORVU4Hr1G087860.1 | 638378121 | 638378871 | Bifunctional inhibitor/lipid-transfer protein/seed storage 2S albumin superfamily protein |
| HORVU4Hr1G087870.1 | 638388268 | 638389146 | Bifunctional inhibitor/lipid-transfer protein/seed storage 2S albumin superfamily protein |
| HORVU4Hr1G087880.1 | 638428432 | 638428842 | 60S ribosomal protein L27-3                                                               |
| HORVU4Hr1G087890.1 | 638478739 | 638479019 | undescribed protein                                                                       |
| HORVU4Hr1G087900.7 | 638479133 | 638484242 | Flavin-containing monooxygenase family protein                                            |
| HORVU4Hr1G087910.1 | 638486373 | 638488116 | HXXXD-type acyl-transferase family protein                                                |
| HORVU4Hr1G087920.1 | 638512331 | 638512750 | Bifunctional inhibitor/lipid-transfer protein/seed storage 2S albumin superfamily protein |
| HORVU4Hr1G087930.1 | 638513260 | 638513517 | undescribed protein                                                                       |
| HORVU4Hr1G087940.1 | 638513647 | 638513841 | unknown function                                                                          |
| HORVU4Hr1G087950.1 | 638514999 | 638515151 | Retrotransposon protein, putative, unclassified                                           |
| HORVU4Hr1G087960.1 | 638634849 | 638636785 | Sodium transporter HKT1                                                                   |
| HORVU4Hr1G087970.1 | 638676269 | 638677708 | TLD-domain containing nucleolar protein                                                   |
| HORVU4Hr1G087980.1 | 638774044 | 638774818 | zinc finger protein 4                                                                     |
| HORVU4Hr1G087990.6 | 639072081 | 639073349 | Endoglucanase 15                                                                          |
| HORVU4Hr1G088000.1 | 639080469 | 639080759 | undescribed protein                                                                       |
| HORVU4Hr1G088010.1 | 639196531 | 639196985 | Protein TIME FOR COFFEE                                                                   |
| HORVU4Hr1G088020.4 | 639208559 | 639213648 | Protein NRT1/ PTR FAMILY 6.3                                                              |

|                     |           |           |                                                       |
|---------------------|-----------|-----------|-------------------------------------------------------|
| HORVU4Hr1G088030.1  | 639209570 | 639210052 | undescribed protein                                   |
| HORVU4Hr1G088040.1  | 639211354 | 639211737 | undescribed protein                                   |
| HORVU4Hr1G088050.1  | 639211900 | 639212080 | undescribed protein                                   |
| HORVU4Hr1G088060.4  | 639214025 | 639219029 | Oxysterol-binding protein-related protein 2A          |
| HORVU4Hr1G088070.1  | 639220179 | 639220679 | undescribed protein                                   |
| HORVU4Hr1G088080.4  | 639392933 | 639395123 | expansin B2                                           |
| HORVU4Hr1G088090.4  | 639495893 | 639498697 | receptor kinase 2                                     |
| HORVU4Hr1G088100.1  | 639682340 | 639682855 | unknown function                                      |
| HORVU4Hr1G088110.1  | 639706538 | 639707881 | Eukaryotic aspartyl protease family protein           |
| HORVU4Hr1G088120.1  | 639717292 | 639717831 | Retrotransposon protein                               |
| HORVU4Hr1G088130.3  | 639721611 | 639722958 | UvrB/uvrC motif-containing protein isoform 5          |
| HORVU4Hr1G088140.2  | 639752757 | 639755359 | expansin B2                                           |
| HORVU4Hr1G088150.1  | 639767541 | 639768193 | undescribed protein                                   |
| HORVU4Hr1G088160.1  | 639772779 | 639774122 | Eukaryotic aspartyl protease family protein           |
| HORVU4Hr1G088170.1  | 639865436 | 639868763 | Transposon protein, putative, CACTA, En/Spm sub-class |
| HORVU4Hr1G088180.1  | 639883596 | 639884246 | undescribed protein                                   |
| HORVU4Hr1G088190.9  | 639939694 | 639946933 | 2-phosphoglycerate kinase                             |
| HORVU4Hr1G088200.1  | 639942466 | 639943237 | Endonuclease-reverse transcriptase HmRTE-e01          |
| HORVU4Hr1G088220.1  | 639950849 | 639951108 | undescribed protein                                   |
| HORVU4Hr1G088210.35 | 639956048 | 639966348 | CCR4-NOT transcription complex subunit 1              |
| HORVU4Hr1G088230.1  | 640109804 | 640110976 | Transposon protein, putative, CACTA, En/Spm sub-class |
| HORVU4Hr1G088240.1  | 640111176 | 640112560 | unknown function                                      |
| HORVU4Hr1G088250.15 | 640120326 | 640127451 | undescribed protein                                   |
| HORVU4Hr1G088260.1  | 640127727 | 640127928 | undescribed protein                                   |
| HORVU4Hr1G088270.14 | 640198187 | 640208474 | ATP-dependent RNA helicase, putative                  |
| HORVU4Hr1G088280.2  | 640310745 | 640313017 | GATA transcription factor 2                           |
| HORVU4Hr1G088290.1  | 640317992 | 640319088 | undescribed protein                                   |
| HORVU4Hr1G088300.1  | 640320298 | 640321148 | undescribed protein                                   |

|                     |           |           |                                                                                             |
|---------------------|-----------|-----------|---------------------------------------------------------------------------------------------|
| HORVU4Hr1G088310.1  | 640327918 | 640328758 | undescribed protein                                                                         |
| HORVU4Hr1G088320.1  | 640333038 | 640333841 | Double Clp-N motif-containing P-loop nucleoside triphosphate hydrolases superfamily protein |
| HORVU4Hr1G088330.1  | 640393516 | 640393749 | undescribed protein                                                                         |
| HORVU4Hr1G088340.10 | 640421579 | 640432476 | 2-oxoglutarate (2OG) and Fe(II)-dependent oxygenase superfamily protein                     |
| HORVU4Hr1G088350.10 | 640434928 | 640441561 | Agenet domain containing protein, expressed                                                 |
| HORVU4Hr1G088360.1  | 640445110 | 640445369 | undescribed protein                                                                         |
| HORVU4Hr1G088370.4  | 640445428 | 640449337 | undescribed protein                                                                         |
| HORVU4Hr1G088380.3  | 640445565 | 640449635 | undescribed protein                                                                         |
| HORVU4Hr1G088390.1  | 640491514 | 640497006 | Coatomer, alpha subunit                                                                     |
| HORVU4Hr1G088400.5  | 640497538 | 640499359 | undescribed protein                                                                         |
| HORVU4Hr1G088410.2  | 640498962 | 640499870 | unknown function                                                                            |
| HORVU4Hr1G088420.1  | 640500341 | 640500764 | undescribed protein                                                                         |
| HORVU4Hr1G088440.10 | 640503829 | 640510906 | Methionyl-tRNA formyltransferase                                                            |
| HORVU4Hr1G088430.17 | 640504902 | 640510925 | Plant protein of unknown function (DUF828) with plant pleckstrin homology-like region       |
| HORVU4Hr1G088450.7  | 640515684 | 640518342 | Plant protein of unknown function (DUF828) with plant pleckstrin homology-like region       |
| HORVU4Hr1G088460.1  | 640520324 | 640520646 | Serine/threonine-protein phosphatase 7 long form-like protein                               |
| HORVU4Hr1G088470.27 | 640535795 | 640538638 | phosphatidylserine decarboxylase 1                                                          |
| HORVU4Hr1G088480.28 | 640540544 | 640546585 | Chromosome 3B, genomic scaffold, cultivar Chinese Spring                                    |
| HORVU4Hr1G088490.1  | 640547189 | 640550955 | Cell number regulator 6                                                                     |
| HORVU4Hr1G088500.2  | 640555331 | 640556013 | undescribed protein                                                                         |
| HORVU4Hr1G088510.1  | 640560265 | 640561373 | undescribed protein                                                                         |
| HORVU4Hr1G088520.1  | 640580304 | 640581107 | Core-2/I-branching beta-1,6-N-acetylglucosaminyltransferase family protein                  |
| HORVU4Hr1G088530.1  | 640584186 | 640586647 | Eukaryotic aspartyl protease family protein                                                 |
| HORVU4Hr1G088540.8  | 640595868 | 640611352 | Chromodomain-helicase-DNA-binding protein 1-like                                            |
| HORVU4Hr1G088550.1  | 640605004 | 640605309 | undescribed protein                                                                         |
| HORVU4Hr1G088570.2  | 640630455 | 640638112 | Leucine-rich repeat receptor-like protein kinase family protein                             |
| HORVU4Hr1G088560.2  | 640630460 | 640640807 | unknown function                                                                            |
| HORVU4Hr1G088580.5  | 640641588 | 640647209 | Leucine-rich repeat receptor-like protein kinase family protein                             |

|                     |           |           |                                                                 |
|---------------------|-----------|-----------|-----------------------------------------------------------------|
| HORVU4Hr1G088590.6  | 640647353 | 640649638 | unknown function                                                |
| HORVU4Hr1G088600.4  | 640650819 | 640654398 | Leucine-rich repeat receptor-like protein kinase family protein |
| HORVU4Hr1G088610.1  | 640662818 | 640665994 | Quinone oxidoreductase                                          |
| HORVU4Hr1G088620.1  | 640666350 | 640668581 | Phosphoglycerate mutase family protein                          |
| HORVU4Hr1G088630.2  | 640671280 | 640671753 | unknown function                                                |
| HORVU4Hr1G088640.1  | 640673927 | 640674503 | Retrotransposon protein, putative, unclassified                 |
| HORVU4Hr1G088650.6  | 640685421 | 640696260 | protein kinase family protein                                   |
| HORVU4Hr1G088660.1  | 640701625 | 640703561 | E3 ubiquitin-protein ligase PRT6                                |
| HORVU4Hr1G088670.3  | 640706584 | 640707045 | unknown function                                                |
| HORVU4Hr1G088680.1  | 640707872 | 640709468 | unknown function                                                |
| HORVU4Hr1G088690.1  | 640711150 | 640712652 | General transcription factor IIH subunit 5                      |
| HORVU4Hr1G088700.2  | 640716984 | 640726190 | ARABIDILLO-1                                                    |
| HORVU4Hr1G088710.1  | 640725147 | 640726035 | undescribed protein                                             |
| HORVU4Hr1G088720.10 | 640726975 | 640730280 | Palmitoyl-protein thioesterase 1                                |
| HORVU4Hr1G088730.1  | 640731610 | 640733054 | undescribed protein                                             |
| HORVU4Hr1G088740.1  | 640731612 | 640733092 | Class I glutamine amidotransferase-like superfamily protein     |
| HORVU4Hr1G088750.1  | 640899336 | 640899443 | undescribed protein                                             |
| HORVU4Hr1G088760.17 | 641042283 | 641047868 | Long chain base biosynthesis protein 2d                         |
| HORVU4Hr1G088770.5  | 641043282 | 641046740 | undescribed protein                                             |
| HORVU4Hr1G088780.1  | 641086962 | 641088357 | early nodulin-like protein 8                                    |
| HORVU4Hr1G088790.5  | 641091033 | 641094510 | arginine/serine-rich splicing factor 35                         |
| HORVU4Hr1G088800.1  | 641133970 | 641134732 | undescribed protein                                             |
| HORVU4Hr1G088810.1  | 641141491 | 641142102 | Retrotransposon protein, putative, unclassified                 |
| HORVU4Hr1G088820.1  | 641145850 | 641152993 | undescribed protein                                             |
| HORVU4Hr1G088830.2  | 641145875 | 641152894 | undescribed protein                                             |
| HORVU4Hr1G088840.2  | 641153746 | 641156383 | Post-GPI attachment to proteins factor 3                        |
| HORVU4Hr1G088850.4  | 641157517 | 641161403 | Protein CHAPERONE-LIKE PROTEIN OF POR1, chloroplastic           |
| HORVU4Hr1G088860.1  | 641185538 | 641189869 | Major facilitator superfamily protein                           |

|                     |           |           |                                                                                  |
|---------------------|-----------|-----------|----------------------------------------------------------------------------------|
| HORVU4Hr1G088870.1  | 641191823 | 641192977 | Mitochondrial import inner membrane translocase subunit TIM23-1                  |
| HORVU4Hr1G088880.7  | 641237832 | 641244215 | kinesin 4                                                                        |
| HORVU4Hr1G088890.2  | 641253106 | 641254865 | Protein NRT1/ PTR FAMILY 8.1                                                     |
| HORVU4Hr1G088900.3  | 641255865 | 641265633 | Alanine--tRNA ligase                                                             |
| HORVU4Hr1G088910.12 | 641271573 | 641284731 | Protein kinase superfamily protein                                               |
| HORVU4Hr1G088920.1  | 641290897 | 641291740 | unknown function                                                                 |
| HORVU4Hr1G088930.2  | 641293496 | 641295060 | P-loop containing nucleoside triphosphate hydrolases superfamily protein         |
| HORVU4Hr1G088940.1  | 641382061 | 641382844 | undescribed protein                                                              |
| HORVU4Hr1G088950.1  | 641383076 | 641384750 | undescribed protein                                                              |
| HORVU4Hr1G088960.2  | 641404116 | 641405408 | undescribed protein                                                              |
| HORVU4Hr1G088970.1  | 641404825 | 641406494 | undescribed protein                                                              |
| HORVU4Hr1G088980.1  | 641405536 | 641408090 | undescribed protein                                                              |
| HORVU4Hr1G088990.1  | 641408194 | 641411623 | undescribed protein                                                              |
| HORVU4Hr1G089000.1  | 641423398 | 641423880 | Transposon protein, putative, Pong sub-class                                     |
| HORVU4Hr1G089010.1  | 641429665 | 641431292 | undescribed protein                                                              |
| HORVU4Hr1G089020.1  | 641454180 | 641454425 | Retrotransposon protein, putative, unclassified, expressed                       |
| HORVU4Hr1G089030.1  | 641464335 | 641465907 | Protein of unknown function, DUF584                                              |
| HORVU4Hr1G089040.1  | 641468548 | 641468670 | undescribed protein                                                              |
| HORVU4Hr1G089050.1  | 641468869 | 641469015 | unknown function                                                                 |
| HORVU4Hr1G089060.3  | 641590688 | 641595759 | L-gulonolactone oxidase 5                                                        |
| HORVU4Hr1G089070.1  | 641592081 | 641592694 | undescribed protein                                                              |
| HORVU4Hr1G089080.3  | 641600093 | 641606961 | UDP-N-acetylglucosamine--peptide N-acetylglucosaminyltransferase 110 kDa subunit |
| HORVU4Hr1G089090.2  | 641608354 | 641613003 | Chaperone protein DnaK                                                           |
| HORVU4Hr1G089100.1  | 641617531 | 641618461 | unknown function                                                                 |
| HORVU4Hr1G089110.1  | 641759666 | 641760070 | undescribed protein                                                              |
| HORVU4Hr1G089120.1  | 641771191 | 641775630 | Trihelix transcription factor GT-2                                               |
| HORVU4Hr1G089130.1  | 641786871 | 641790804 | TTF-type zinc finger protein with HAT dimerisation domain                        |
| HORVU4Hr1G089140.1  | 641790981 | 641791310 | hAT dimerisation domain-containing protein / transposase-related                 |

|                     |           |           |                                                                         |
|---------------------|-----------|-----------|-------------------------------------------------------------------------|
| HORVU4Hr1G089150.1  | 641794439 | 641795275 | undescribed protein                                                     |
| HORVU4Hr1G089160.1  | 641798627 | 641801315 | unknown function                                                        |
| HORVU4Hr1G089170.1  | 641806339 | 641807327 | undescribed protein                                                     |
| HORVU4Hr1G089180.1  | 641837276 | 641838618 | Retrotransposon protein, putative, unclassified                         |
| HORVU4Hr1G089190.1  | 641839374 | 641840867 | undescribed protein                                                     |
| HORVU4Hr1G089200.2  | 641851862 | 641853556 | Protein kinase superfamily protein                                      |
| HORVU4Hr1G089210.1  | 641904210 | 641906080 | Plant protein of unknown function (DUF247)                              |
| HORVU4Hr1G089220.2  | 641910099 | 641911620 | Protein LURP-one-related 8                                              |
| HORVU4Hr1G089230.1  | 641924251 | 641926641 | Cytochrome P450 superfamily protein                                     |
| HORVU4Hr1G089240.1  | 642024767 | 642025697 | unknown function                                                        |
| HORVU4Hr1G089250.1  | 642027381 | 642027828 | Retrotransposon protein, putative, unclassified                         |
| HORVU4Hr1G089260.1  | 642028955 | 642029657 | undescribed protein                                                     |
| HORVU4Hr1G089270.1  | 642064582 | 642066848 | Zinc finger CCCH domain-containing protein 20                           |
| HORVU4Hr1G089280.5  | 642067124 | 642071227 | Transmembrane and coiled-coil domain-containing protein 4               |
| HORVU4Hr1G089300.1  | 642149539 | 642149808 | undescribed protein                                                     |
| HORVU4Hr1G089310.19 | 642155943 | 642276817 | AP-2 complex subunit alpha-1                                            |
| HORVU4Hr1G089310.19 | 642155943 | 642276817 | AP-2 complex subunit alpha-1                                            |
| HORVU4Hr1G089320.1  | 642174952 | 642176162 | Zinc finger CCCH domain-containing protein 44                           |
| HORVU4Hr1G089330.2  | 642199303 | 642201938 | 2-oxoglutarate (2OG) and Fe(II)-dependent oxygenase superfamily protein |
| HORVU4Hr1G089340.1  | 642200689 | 642201204 | undescribed protein                                                     |
| HORVU4Hr1G089350.4  | 642210402 | 642217528 | WD repeat-containing protein 6                                          |
| HORVU4Hr1G089360.1  | 642223610 | 642225409 | Flavin-containing monooxygenase family protein                          |
| HORVU4Hr1G089370.1  | 642233366 | 642234607 | General transcription factor 2-related zinc finger protein              |
| HORVU4Hr1G089380.1  | 642236484 | 642236702 | unknown function                                                        |
| HORVU4Hr1G089390.1  | 642244367 | 642244741 | unknown function                                                        |
| HORVU4Hr1G089400.3  | 642249025 | 642249328 | L-tyrosine decarboxylase                                                |
| HORVU4Hr1G089410.1  | 642261253 | 642262994 | 2-oxoglutarate (2OG) and Fe(II)-dependent oxygenase superfamily protein |
| HORVU4Hr1G089290.7  | 642309174 | 642316391 | Zinc finger CCCH domain-containing protein 19                           |

|                     |           |           |                                                                         |
|---------------------|-----------|-----------|-------------------------------------------------------------------------|
| HORVU4Hr1G089420.1  | 642383189 | 642383376 | unknown function                                                        |
| HORVU4Hr1G089430.1  | 642393080 | 642393434 | undescribed protein                                                     |
| HORVU4Hr1G089440.1  | 642462273 | 642462618 | Retrotransposon protein, putative, unclassified                         |
| HORVU4Hr1G089450.1  | 642496560 | 642498144 | NAC domain protein,                                                     |
| HORVU4Hr1G089460.1  | 642513360 | 642523797 | receptor-like protein kinase 1                                          |
| HORVU4Hr1G089470.2  | 642527742 | 642530387 | dihydroflavonol 4-reductase                                             |
| HORVU4Hr1G089480.1  | 642535429 | 642537069 | 2-oxoglutarate (2OG) and Fe(II)-dependent oxygenase superfamily protein |
| HORVU4Hr1G089490.2  | 642543999 | 642544800 | Non-specific lipid-transfer protein 2G                                  |
| HORVU4Hr1G089500.1  | 642559204 | 642559830 | Non-specific lipid-transfer protein 2G                                  |
| HORVU4Hr1G089510.3  | 642560707 | 642564722 | beta-amylase 5                                                          |
| HORVU4Hr1G089520.1  | 642568886 | 642570443 | Heavy metal-associated domain, putative                                 |
| HORVU4Hr1G089530.1  | 642569427 | 642569815 | undescribed protein                                                     |
| HORVU4Hr1G089540.2  | 642587402 | 642590164 | Remorin family protein                                                  |
| HORVU4Hr1G089550.1  | 642984437 | 642985124 | undescribed protein                                                     |
| HORVU4Hr1G089560.2  | 643004384 | 643006737 | Chromosome 3B, genomic scaffold, cultivar Chinese Spring                |
| HORVU4Hr1G089570.1  | 643009098 | 643009715 | undescribed protein                                                     |
| HORVU4Hr1G089580.1  | 643012334 | 643013799 | sulfotransferase 4B                                                     |
| HORVU4Hr1G089600.1  | 643055182 | 643056109 | undescribed protein                                                     |
| HORVU4Hr1G089590.18 | 643060225 | 643064076 | Small nuclear ribonucleoprotein family protein                          |
| HORVU4Hr1G089610.2  | 643065153 | 643069109 | glycerol-3-phosphate acyltransferase 3                                  |
| HORVU4Hr1G089620.1  | 643184706 | 643185401 | Folylpolyglutamate synthase                                             |
| HORVU4Hr1G089630.1  | 643221126 | 643222775 | undescribed protein                                                     |
| HORVU4Hr1G089640.1  | 643365019 | 643366386 | undescribed protein                                                     |
| HORVU4Hr1G089650.1  | 643371175 | 643371873 | Retrotransposon protein, putative, Ty1-copia subclass                   |
| HORVU4Hr1G089660.1  | 643378290 | 643379142 | NAC domain containing protein 32                                        |
| HORVU4Hr1G089670.1  | 643380058 | 643381950 | Galactosyl transferase GMA12/MNN10 family protein                       |
| HORVU4Hr1G089680.1  | 643396960 | 643397346 | undescribed protein                                                     |
| HORVU4Hr1G089690.3  | 643401272 | 643403295 | FLOWERING LOCUS T protein, putative                                     |

|                    |           |           |                                                          |
|--------------------|-----------|-----------|----------------------------------------------------------|
| HORVU4Hr1G089700.1 | 643406292 | 643406675 | unknown function                                         |
| HORVU4Hr1G089710.1 | 643432434 | 643433091 | Chromosome 3B, genomic scaffold, cultivar Chinese Spring |
| HORVU4Hr1G089720.1 | 643438068 | 643441387 | polyubiquitin 10                                         |
| HORVU4Hr1G089730.5 | 643447233 | 643450680 | DNA (cytosine-5)-methyltransferase DRM2                  |
| HORVU4Hr1G089740.1 | 643469531 | 643471438 | unknown function                                         |
| HORVU4Hr1G089750.1 | 643496721 | 643497628 | nicotianamine synthase 3                                 |
| HORVU4Hr1G089750.1 | 643496721 | 643497628 | nicotianamine synthase 3                                 |
| HORVU4Hr1G089760.1 | 643505736 | 643506752 | rRNA N-glycosidase                                       |
| HORVU4Hr1G089770.1 | 643510944 | 643513556 | unknown function                                         |
| HORVU4Hr1G089780.1 | 643514792 | 643515901 | rRNA N-glycosidase                                       |
| HORVU4Hr1G089790.1 | 643531658 | 643532317 | unknown function                                         |
| HORVU4Hr1G089800.1 | 643539316 | 643553308 | undescribed protein                                      |
| HORVU4Hr1G089810.1 | 643554452 | 643554697 | undescribed protein                                      |
| HORVU4Hr1G089820.7 | 643555408 | 643563271 | THO complex subunit 1                                    |
| HORVU4Hr1G089830.2 | 643624525 | 643625498 | unknown function                                         |
| HORVU4Hr1G089840.1 | 643628611 | 643629033 | unknown function                                         |
| HORVU4Hr1G089850.2 | 643641394 | 643644339 | rRNA N-glycosidase                                       |
| HORVU4Hr1G089860.1 | 643645935 | 643646389 | unknown function                                         |
| HORVU4Hr1G089870.1 | 643649672 | 643650337 | nicotianamine synthase 4                                 |
| HORVU4Hr1G089880.1 | 643667668 | 643670890 | Embryogenesis transmembrane protein-like                 |
| HORVU4Hr1G089890.1 | 643676698 | 643680809 | Embryogenesis transmembrane protein-like                 |
| HORVU4Hr1G089900.1 | 643698720 | 643699836 | HXXXD-type acyl-transferase family protein               |
| HORVU4Hr1G089910.8 | 643754944 | 643757160 | Peptidoglycan-binding LysM domain-containing protein     |
| HORVU4Hr1G089920.1 | 643756201 | 643756656 | undescribed protein                                      |
| HORVU4Hr1G089930.1 | 643802641 | 643803933 | Dirigent, putative, expressed                            |
| HORVU4Hr1G089940.1 | 643849687 | 643850352 | undescribed protein                                      |
| HORVU4Hr1G089950.2 | 644014518 | 644014748 | Beta-fructofuranosidase, soluble isoenzyme I             |
| HORVU4Hr1G089960.1 | 644025240 | 644025680 | unknown function                                         |



|                     |           |           |                                                                                |
|---------------------|-----------|-----------|--------------------------------------------------------------------------------|
| HORVU4Hr1G089970.1  | 644027463 | 644027603 | HAT family dimerisation domain containing protein, expressed                   |
| HORVU4Hr1G089980.1  | 644027616 | 644029495 | TTF-type zinc finger protein with HAT dimerisation domain                      |
| HORVU4Hr1G089990.4  | 644043699 | 644046293 | Protein WEAK CHLOROPLAST MOVEMENT UNDER BLUE LIGHT 1                           |
| HORVU4Hr1G090000.4  | 644046935 | 644048843 | unknown protein; BEST Arabidopsis thaliana protein match is: unknown protein . |
| HORVU4Hr1G090010.1  | 644327130 | 644327811 | undescribed protein                                                            |
| HORVU4Hr1G090020.2  | 644335686 | 644338588 | Leucine-rich repeat receptor-like protein kinase family protein                |
| HORVU4Hr1G090030.3  | 644342602 | 644351407 | Homeobox-leucine zipper protein HOX10                                          |
| HORVU4Hr1G090040.1  | 644352889 | 644353678 | unknown function                                                               |
| HORVU4Hr1G090050.3  | 644380174 | 644381317 | Peroxidase superfamily protein                                                 |
| HORVU4Hr1G090060.1  | 644390902 | 644391988 | unknown function                                                               |
| HORVU4Hr1G090070.1  | 644399260 | 644399972 | undescribed protein                                                            |
| HORVU4Hr1G090080.1  | 644409589 | 644417798 | Malate dehydrogenase                                                           |
| HORVU4Hr1G090090.4  | 644434690 | 644435863 | Heat stress transcription factor C-2a                                          |
| HORVU4Hr1G090100.1  | 644442321 | 644443454 | undescribed protein                                                            |
| HORVU4Hr1G090110.5  | 644449280 | 644450579 | Nascent polypeptide-associated complex subunit beta                            |
| HORVU4Hr1G090120.1  | 644475545 | 644476628 | germin-like protein 9                                                          |
| HORVU4Hr1G090130.1  | 644480922 | 644481931 | germin-like protein 2                                                          |
| HORVU4Hr1G090140.1  | 644484458 | 644485142 | germin-like protein 9                                                          |
| HORVU4Hr1G090150.1  | 644506183 | 644508490 | peptidyl-prolyl cis-trans isomerases                                           |
| HORVU4Hr1G090160.1  | 644508965 | 644513417 | DNA repair endonuclease UVH1                                                   |
| HORVU4Hr1G090180.1  | 644543466 | 644543732 | undescribed protein                                                            |
| HORVU4Hr1G090190.4  | 644547127 | 644548791 | germin-like protein 2                                                          |
| HORVU4Hr1G090170.17 | 644551948 | 644565388 | tRNA/rRNA methyltransferase (SpoU) family protein                              |
| HORVU4Hr1G090200.1  | 644566417 | 644566659 | undescribed protein                                                            |
| HORVU4Hr1G090210.1  | 644566855 | 644571558 | DNA repair endonuclease UVH1                                                   |
| HORVU4Hr1G090220.1  | 644572117 | 644574424 | Peptidyl-prolyl cis-trans isomerase-like 3                                     |

---

**Supplementary Table 3:** *H. spontaneum* and *H. vulgare landrace* HvHKT1;5 genotypic data. Includes all non-synonymous SNPs for *H. spontaneum* accessions, location in amino acid sequence is provides in top header row, and location in CDS in second header row.

| Germplasm            | L189P | NCBI ref | Q18H | F26S | H29R | S56N  | E102Q | K130N | P133Q | R166H | L189P | V223I | G285C | V308M | V310G |
|----------------------|-------|----------|------|------|------|-------|-------|-------|-------|-------|-------|-------|-------|-------|-------|
|                      |       |          | G54T | T77C | A86G | G170A | G304C | A393T | C401A | G498A | T567C | G670A | G854T | G923A | T920G |
| <i>H. spontaneum</i> | P     | MT334696 | G    | T    | A    | A     | G     | A     | C     | G     | C     | A     | G     | G     | T     |
| <i>H. spontaneum</i> | L     | MT334697 | .    | C    | .    | G     | C     | .     | .     | .     | T     | .     | .     | .     | .     |
| <i>H. spontaneum</i> | L     | MT334698 | .    | C    | .    | .     | .     | .     | .     | .     | T     | .     | .     | .     | .     |
| <i>H. spontaneum</i> | L     | MT334699 | .    | C    | .    | G     | C     | .     | .     | .     | T     | .     | .     | .     | .     |
| <i>H. spontaneum</i> | L     | MT334700 | .    | C    | .    | G     | C     | .     | .     | .     | T     | .     | .     | .     | .     |
| <i>H. spontaneum</i> | L     | MT334701 | .    | C    | .    | G     | C     | .     | .     | .     | T     | .     | .     | .     | .     |
| <i>H. spontaneum</i> | L     | MT334702 | .    | C    | .    | G     | C     | .     | .     | .     | T     | .     | .     | .     | .     |
| <i>H. spontaneum</i> | L     | MT334703 | .    | C    | .    | G     | C     | .     | .     | .     | T     | .     | .     | .     | .     |
| <i>H. spontaneum</i> | L     | MT334704 | .    | C    | .    | G     | C     | .     | .     | .     | T     | .     | .     | .     | .     |
| <i>H. spontaneum</i> | L     | MT334705 | .    | C    | .    | G     | C     | .     | .     | .     | T     | .     | .     | .     | .     |
| <i>H. spontaneum</i> | L     | MT334706 | .    | C    | .    | G     | C     | .     | .     | .     | T     | .     | .     | .     | .     |
| <i>H. spontaneum</i> | L     | MT334707 | .    | C    | .    | G     | C     | .     | .     | .     | T     | .     | .     | .     | .     |
| <i>H. spontaneum</i> | L     | MT334708 | .    | C    | .    | G     | C     | .     | .     | .     | T     | .     | .     | .     | .     |
| <i>H. spontaneum</i> | L     | MT334709 | .    | C    | .    | G     | C     | .     | .     | .     | T     | .     | .     | .     | .     |
| <i>H. spontaneum</i> | L     | MT334710 | .    | C    | .    | G     | C     | .     | .     | .     | T     | .     | .     | .     | .     |
| <i>H. spontaneum</i> | L     | MT334711 | .    | C    | .    | G     | C     | .     | .     | .     | T     | .     | .     | .     | .     |
| <i>H. spontaneum</i> | L     | MT334712 | .    | C    | .    | G     | C     | .     | .     | .     | T     | .     | .     | .     | .     |
| <i>H. spontaneum</i> | L     | MT334713 | .    | C    | .    | G     | C     | .     | .     | .     | T     | .     | .     | .     | .     |
| <i>H. spontaneum</i> | L     | MT334714 | .    | C    | .    | G     | C     | .     | .     | .     | T     | .     | .     | .     | .     |
| <i>H. spontaneum</i> | L     | MT334715 | .    | C    | .    | G     | C     | .     | .     | .     | T     | .     | .     | .     | .     |
| <i>H. spontaneum</i> | L     | MT334716 | .    | C    | .    | G     | C     | .     | .     | .     | T     | .     | .     | .     | .     |
| <i>H. spontaneum</i> | L     | MT334717 | .    | C    | .    | G     | C     | .     | .     | .     | T     | .     | .     | .     | .     |
| <i>H. spontaneum</i> | L     | MT334718 | .    | C    | .    | G     | C     | .     | .     | .     | T     | .     | .     | .     | .     |
| <i>H. spontaneum</i> | L     | MT334719 | .    | C    | .    | G     | C     | .     | .     | .     | T     | .     | .     | .     | .     |
| <i>H. spontaneum</i> | L     | MT334720 | .    | C    | .    | G     | C     | .     | .     | .     | T     | .     | .     | .     | .     |

*H. spontaneum*

L MT334721 . C . G C . . . T . . . .

|                      |       |          |      |      |      |       |       |       |       |       |       |       |       |       |       |
|----------------------|-------|----------|------|------|------|-------|-------|-------|-------|-------|-------|-------|-------|-------|-------|
| <i>H. spontaneum</i> | L     | MT334722 | .    | C    | .    | G     | C     | .     | .     | .     | T     | .     | .     | .     | .     |
| <i>H. spontaneum</i> | L     | MT334723 | .    | C    | .    | G     | C     | .     | .     | .     | T     | .     | .     | .     | .     |
| <i>H. spontaneum</i> | L     | MT334724 | .    | C    | .    | G     | C     | .     | .     | .     | T     | G     | .     | .     | .     |
| <i>H. spontaneum</i> | L     | MT334725 | .    | C    | .    | G     | C     | T     | .     | .     | T     | G     | .     | .     | .     |
| <i>H. spontaneum</i> | L     | MT334726 | .    | C    | .    | G     | C     | T     | .     | .     | T     | G     | .     | .     | .     |
| <i>H. spontaneum</i> | L     | MT334727 | .    | C    | .    | G     | C     | T     | .     | .     | T     | G     | .     | .     | .     |
| <i>H. spontaneum</i> | L     | MT334728 | .    | C    | .    | G     | C     | T     | .     | .     | T     | G     | T     | .     | .     |
| <i>H. spontaneum</i> | L     | MT334729 | .    | C    | .    | G     | C     | T     | .     | .     | T     | G     | T     | .     | .     |
| <i>H. spontaneum</i> | L     | MT334730 | .    | C    | .    | G     | .     | .     | .     | .     | T     | .     | .     | .     | G     |
| <i>H. spontaneum</i> | L     | MT334731 | .    | C    | .    | G     | .     | .     | .     | .     | T     | .     | .     | .     | .     |
| <i>H. spontaneum</i> | L     | MT334732 | .    | C    | .    | G     | .     | .     | .     | .     | T     | .     | .     | .     | .     |
| <i>H. spontaneum</i> | L     | MT334733 | .    | C    | .    | G     | .     | .     | .     | .     | T     | .     | .     | .     | .     |
| <i>H. spontaneum</i> | L     | MT334734 | .    | C    | .    | G     | .     | .     | .     | .     | T     | .     | .     | .     | .     |
| <i>H. spontaneum</i> | L     | MT334735 | .    | C    | .    | G     | .     | .     | .     | .     | T     | .     | .     | .     | .     |
| <i>H. spontaneum</i> | L     | MT334736 | .    | C    | .    | G     | .     | .     | .     | .     | T     | .     | .     | .     | .     |
| Germplasm            | L189P | NCBI ref | Q18H | F26S | H29R | S56N  | E102Q | K130N | P133Q | R166H | L189P | V223I | G285C | V308M | V310G |
|                      |       |          | G54T | T77C | A86G | G170A | G304C | A393T | C401A | G498A | T567C | G670A | G854T | G923A | T920G |
| <i>H. spontaneum</i> | L     | MT334737 | .    | C    | .    | G     | .     | .     | .     | .     | T     | .     | .     | .     | .     |
| <i>H. spontaneum</i> | L     | MT334738 | .    | C    | .    | G     | .     | .     | .     | .     | T     | .     | .     | .     | .     |
| <i>H. spontaneum</i> | L     | MT334739 | .    | C    | .    | G     | .     | .     | .     | .     | T     | .     | .     | .     | .     |
| <i>H. spontaneum</i> | L     | MT334740 | .    | C    | .    | G     | .     | .     | .     | .     | T     | .     | .     | A     | .     |
| <i>H. spontaneum</i> | L     | MT334741 | .    | C    | .    | G     | .     | .     | .     | .     | T     | .     | .     | A     | .     |
| <i>H. spontaneum</i> | L     | MT334742 | .    | C    | .    | G     | .     | .     | .     | .     | T     | .     | .     | .     | .     |
| <i>H. spontaneum</i> | L     | MT334743 | .    | C    | .    | G     | .     | .     | .     | .     | T     | .     | .     | .     | .     |
| <i>H. spontaneum</i> | L     | MT334744 | .    | C    | .    | G     | .     | .     | .     | .     | T     | .     | .     | .     | .     |
| <i>H. spontaneum</i> | L     | MT334745 | .    | C    | .    | G     | .     | .     | .     | .     | T     | .     | .     | .     | .     |
| <i>H. spontaneum</i> | L     | MT334746 | .    | C    | .    | G     | .     | .     | .     | .     | T     | .     | .     | .     | .     |
| <i>H. spontaneum</i> | L     | MT334747 | .    | C    | .    | G     | .     | .     | .     | .     | T     | .     | .     | .     | .     |

|                      |   |          |   |   |   |   |   |   |   |   |   |   |   |   |   |
|----------------------|---|----------|---|---|---|---|---|---|---|---|---|---|---|---|---|
| <i>H. spontaneum</i> | L | MT334748 | . | C | . | G | . | . | . | . | T | . | . | . | . |
| <i>H. spontaneum</i> | L | MT334749 | . | C | . | G | . | . | . | . | T | . | . | . | . |
| <i>H. spontaneum</i> | L | MT334750 | . | C | . | G | . | . | . | . | T | . | . | . | . |
| <i>H. spontaneum</i> | L | MT334751 | . | C | . | G | . | . | . | . | T | . | . | . | . |
| <i>H. spontaneum</i> | L | MT334752 | . | C | . | G | . | . | . | . | T | . | . | . | . |
| <i>H. spontaneum</i> | L | MT334753 | . | C | . | G | . | . | . | . | T | . | . | . | . |
| <i>H. spontaneum</i> | L | MT334754 | . | C | . | G | . | . | . | . | T | . | . | . | . |
| <i>H. spontaneum</i> | L | MT334755 | . | C | . | G | . | . | . | . | T | . | . | . | . |
| <i>H. spontaneum</i> | L | MT334756 | . | C | . | G | . | . | . | . | T | . | . | . | . |
| <i>H. spontaneum</i> | L | MT334757 | . | C | . | G | . | . | . | . | T | . | . | . | . |
| <i>H. spontaneum</i> | L | MT334758 | . | C | . | G | . | . | . | . | T | . | . | . | . |
| <i>H. spontaneum</i> | L | MT334759 | . | C | . | G | . | . | . | . | T | . | . | . | . |
| <i>H. spontaneum</i> | L | MT334760 | . | C | . | G | . | . | . | . | T | . | . | . | . |
| <i>H. spontaneum</i> | L | MT334761 | . | C | . | G | . | . | . | . | T | . | . | . | . |
| <i>H. spontaneum</i> | L | MT334762 | . | C | . | G | . | . | . | . | T | . | . | . | . |
| <i>H. spontaneum</i> | L | MT334763 | . | C | . | G | . | . | . | . | T | . | . | . | . |
| <i>H. spontaneum</i> | L | MT334764 | . | C | . | G | . | . | . | . | T | . | . | . | . |
| <i>H. spontaneum</i> | L | MT334765 | . | C | . | G | . | . | . | . | T | . | . | . | . |
| <i>H. spontaneum</i> | L | MT334766 | . | C | . | G | . | . | . | . | T | . | . | . | . |
| <i>H. spontaneum</i> | L | MT334767 | . | C | . | G | . | . | . | . | T | . | . | . | . |
| <i>H. spontaneum</i> | L | MT334768 | . | C | . | G | . | T | . | A | T | G | . | . | . |
| <i>H. spontaneum</i> | L | MT334769 | . | C | . | G | . | T | A | . | T | . | . | . | . |
| <i>H. spontaneum</i> | L | MT334770 | . | C | . | G | . | T | A | . | T | G | . | . | . |
| <i>H. spontaneum</i> | L | MT334771 | . | C | . | G | . | . | . | . | T | . | . | . | . |
| <i>H. spontaneum</i> | L | MT334772 | . | C | . | G | . | . | . | . | T | . | . | . | . |
| <i>H. spontaneum</i> | L | MT334773 | . | C | G | G | . | . | . | . | T | . | . | . | . |
| <i>H. spontaneum</i> | L | MT334774 | . | C | G | G | . | . | . | . | T | . | . | . | . |
| <i>H. spontaneum</i> | L | MT334775 | T | C | . | G | . | . | . | . | T | . | . | . | . |



*H. vulgare landrace*      L      n/a















| Germplasm            | L189P | NCBI ref | A379T  | L382Q  | Q402H  | K403M  | I416V  | V436I  | N438S  | T463A  | R481M  | Q482E  | V490L  |
|----------------------|-------|----------|--------|--------|--------|--------|--------|--------|--------|--------|--------|--------|--------|
|                      |       |          | G1136A | T1145A | G1206C | A1208T | A1248G | G1306A | A1404G | A1384G | A1439T | G1441C | G1465C |
| <i>H. spontaneum</i> | P     | MT334696 | A      | T      | C      | A      | G      | G      | G      | A      | G      | G      | G      |
| <i>H. spontaneum</i> | L     | MT334697 | .      | .      | .      | .      | A      | .      | A      | G      | .      | .      | .      |
| <i>H. spontaneum</i> | L     | MT334698 | .      | .      | G      | .      | A      | .      | A      | G      | .      | .      | .      |
| <i>H. spontaneum</i> | L     | MT334699 | .      | A      | .      | .      | A      | .      | .      | G      | .      | .      | C      |
| <i>H. spontaneum</i> | L     | MT334700 | .      | A      | .      | .      | A      | .      | A      | G      | .      | .      | .      |
| <i>H. spontaneum</i> | L     | MT334701 | .      | A      | .      | .      | A      | .      | A      | G      | .      | .      | .      |
| <i>H. spontaneum</i> | L     | MT334702 | .      | A      | .      | .      | A      | .      | A      | G      | .      | .      | .      |
| <i>H. spontaneum</i> | L     | MT334703 | .      | A      | .      | .      | A      | .      | A      | G      | .      | .      | .      |
| <i>H. spontaneum</i> | L     | MT334704 | .      | .      | .      | T      | A      | .      | .      | G      | .      | .      | .      |
| <i>H. spontaneum</i> | L     | MT334705 | .      | .      | .      | T      | A      | .      | .      | G      | .      | .      | .      |
| <i>H. spontaneum</i> | L     | MT334706 | .      | .      | .      | T      | A      | .      | .      | G      | .      | .      | .      |
| <i>H. spontaneum</i> | L     | MT334707 | .      | .      | .      | T      | A      | .      | .      | G      | .      | .      | .      |
| <i>H. spontaneum</i> | L     | MT334708 | .      | .      | .      | .      | A      | .      | .      | G      | .      | .      | .      |
| <i>H. spontaneum</i> | L     | MT334709 | .      | .      | .      | .      | A      | A      | .      | G      | .      | .      | .      |
| <i>H. spontaneum</i> | L     | MT334710 | .      | .      | .      | .      | A      | .      | A      | G      | .      | .      | .      |
| <i>H. spontaneum</i> | L     | MT334711 | .      | .      | .      | .      | A      | .      | A      | G      | .      | .      | .      |
| <i>H. spontaneum</i> | L     | MT334712 | .      | .      | .      | .      | A      | .      | A      | G      | .      | .      | .      |
| <i>H. spontaneum</i> | L     | MT334713 | .      | .      | .      | .      | A      | .      | A      | G      | .      | .      | .      |
| <i>H. spontaneum</i> | L     | MT334714 | .      | .      | .      | .      | A      | .      | A      | G      | .      | .      | .      |
| <i>H. spontaneum</i> | L     | MT334715 | .      | .      | .      | .      | A      | .      | A      | G      | .      | .      | .      |
| <i>H. spontaneum</i> | L     | MT334716 | .      | .      | .      | .      | A      | .      | A      | G      | .      | .      | .      |
| <i>H. spontaneum</i> | L     | MT334717 | .      | .      | .      | .      | A      | .      | A      | G      | .      | .      | .      |
| <i>H. spontaneum</i> | L     | MT334718 | .      | .      | .      | .      | A      | .      | A      | G      | .      | .      | .      |
| <i>H. spontaneum</i> | L     | MT334719 | .      | .      | .      | .      | A      | .      | A      | G      | .      | .      | .      |
| <i>H. spontaneum</i> | L     | MT334720 | .      | .      | .      | .      | A      | .      | A      | G      | .      | .      | .      |
| <i>H. spontaneum</i> | L     | MT334721 | .      | .      | .      | .      | A      | .      | A      | G      | .      | .      | .      |

|                      |       |          |        |        |        |        |        |        |        |        |        |        |        |
|----------------------|-------|----------|--------|--------|--------|--------|--------|--------|--------|--------|--------|--------|--------|
| <i>H. spontaneum</i> | L     | MT334722 | .      | .      | .      | .      | A      | .      | A      | G      | .      | .      | .      |
| <i>H. spontaneum</i> | L     | MT334723 | .      | .      | .      | .      | A      | .      | A      | G      | .      | .      | .      |
| <i>H. spontaneum</i> | L     | MT334724 | .      | .      | .      | .      | A      | .      | A      | G      | .      | .      | .      |
| <i>H. spontaneum</i> | L     | MT334725 | G      | .      | G      | .      | A      | .      | A      | G      | .      | .      | .      |
| <i>H. spontaneum</i> | L     | MT334726 | G      | .      | G      | .      | A      | .      | A      | G      | .      | .      | .      |
| <i>H. spontaneum</i> | L     | MT334727 | G      | .      | G      | .      | A      | .      | A      | G      | .      | .      | .      |
| <i>H. spontaneum</i> | L     | MT334728 | G      | .      | G      | .      | A      | .      | A      | G      | .      | .      | .      |
| <i>H. spontaneum</i> | L     | MT334729 | G      | .      | G      | .      | A      | .      | A      | G      | .      | .      | .      |
| <i>H. spontaneum</i> | L     | MT334730 | .      | A      | .      | .      | A      | .      | A      | G      | .      | .      | .      |
| <i>H. spontaneum</i> | L     | MT334731 | .      | A      | .      | .      | A      | .      | A      | G      | .      | .      | .      |
| <i>H. spontaneum</i> | L     | MT334732 | .      | A      | .      | .      | A      | .      | A      | G      | .      | .      | .      |
| <i>H. spontaneum</i> | L     | MT334733 | .      | A      | .      | .      | A      | .      | A      | G      | .      | .      | .      |
| <i>H. spontaneum</i> | L     | MT334734 | .      | A      | .      | .      | A      | .      | A      | G      | .      | .      | .      |
| <i>H. spontaneum</i> | L     | MT334735 | .      | A      | .      | .      | A      | .      | A      | G      | .      | .      | .      |
| <i>H. spontaneum</i> | L     | MT334736 | .      | .      | .      | .      | A      | .      | A      | G      | .      | .      | .      |
| Germplasm            | L189P | NCBI ref | A379T  | L382Q  | Q402H  | K403M  | I416V  | V436I  | N438S  | T463A  | R481M  | Q482E  | V490L  |
|                      |       |          | G1136A | T1145A | G1206C | A1208T | A1248G | G1306A | A1404G | A1384G | A1439T | G1441C | G1465C |
| <i>H. spontaneum</i> | L     | MT334737 | .      | .      | .      | .      | A      | .      | A      | G      | .      | .      | .      |
| <i>H. spontaneum</i> | L     | MT334738 | .      | .      | .      | .      | A      | .      | A      | G      | .      | .      | .      |
| <i>H. spontaneum</i> | L     | MT334739 | .      | .      | .      | .      | A      | .      | .      | G      | .      | .      | .      |
| <i>H. spontaneum</i> | L     | MT334740 | .      | .      | .      | .      | A      | .      | .      | G      | .      | .      | .      |
| <i>H. spontaneum</i> | L     | MT334741 | .      | .      | .      | .      | A      | .      | .      | G      | .      | .      | .      |
| <i>H. spontaneum</i> | L     | MT334742 | .      | .      | .      | .      | A      | .      | A      | G      | .      | .      | .      |
| <i>H. spontaneum</i> | L     | MT334743 | .      | .      | .      | .      | A      | .      | A      | G      | .      | .      | .      |
| <i>H. spontaneum</i> | L     | MT334744 | .      | .      | .      | .      | A      | .      | A      | G      | .      | .      | .      |
| <i>H. spontaneum</i> | L     | MT334745 | .      | .      | .      | .      | A      | .      | A      | G      | .      | .      | .      |
| <i>H. spontaneum</i> | L     | MT334746 | .      | .      | .      | .      | A      | .      | A      | G      | .      | .      | .      |
| <i>H. spontaneum</i> | L     | MT334747 | .      | .      | .      | .      | A      | .      | A      | G      | .      | .      | .      |

|                      |   |          |   |   |   |   |   |   |   |   |   |   |   |
|----------------------|---|----------|---|---|---|---|---|---|---|---|---|---|---|
| <i>H. spontaneum</i> | L | MT334748 | . | . | . | . | A | . | A | G | . | . | . |
| <i>H. spontaneum</i> | L | MT334749 | . | . | . | . | A | . | A | G | . | . | . |
| <i>H. spontaneum</i> | L | MT334750 | . | . | . | . | A | . | A | G | . | . | . |
| <i>H. spontaneum</i> | L | MT334751 | . | . | . | . | A | . | A | G | . | . | . |
| <i>H. spontaneum</i> | L | MT334752 | . | . | . | . | A | . | A | G | . | . | . |
| <i>H. spontaneum</i> | L | MT334753 | . | . | . | . | A | . | A | G | . | . | . |
| <i>H. spontaneum</i> | L | MT334754 | . | . | . | . | A | . | A | G | . | . | . |
| <i>H. spontaneum</i> | L | MT334755 | . | . | . | . | A | . | A | G | . | . | . |
| <i>H. spontaneum</i> | L | MT334756 | . | . | . | . | A | . | A | G | . | . | . |
| <i>H. spontaneum</i> | L | MT334757 | . | . | . | . | A | . | A | G | . | . | . |
| <i>H. spontaneum</i> | L | MT334758 | . | . | . | T | A | . | . | G | . | . | . |
| <i>H. spontaneum</i> | L | MT334759 | . | . | . | T | A | . | . | G | . | . | . |
| <i>H. spontaneum</i> | L | MT334760 | . | . | . | T | A | . | . | G | . | . | . |
| <i>H. spontaneum</i> | L | MT334761 | . | . | . | T | A | . | . | G | . | . | . |
| <i>H. spontaneum</i> | L | MT334762 | . | . | . | T | A | . | . | G | . | . | . |
| <i>H. spontaneum</i> | L | MT334763 | . | . | . | T | A | . | . | G | . | . | . |
| <i>H. spontaneum</i> | L | MT334764 | . | . | . | T | A | . | . | G | . | . | . |
| <i>H. spontaneum</i> | L | MT334765 | . | . | . | T | A | . | . | G | . | . | . |
| <i>H. spontaneum</i> | L | MT334766 | . | . | . | T | A | . | . | G | . | . | . |
| <i>H. spontaneum</i> | L | MT334767 | . | . | . | T | A | . | . | G | . | . | . |
| <i>H. spontaneum</i> | L | MT334768 | G | . | G | . | A | . | A | G | . | . | . |
| <i>H. spontaneum</i> | L | MT334769 | G | . | G | . | A | . | A | G | . | . | . |
| <i>H. spontaneum</i> | L | MT334770 | G | . | G | . | A | . | A | G | . | . | . |
| <i>H. spontaneum</i> | L | MT334771 | G | . | G | . | A | . | A | G | . | . | . |
| <i>H. spontaneum</i> | L | MT334772 | G | . | G | . | A | . | A | G | T | C | . |
| <i>H. spontaneum</i> | L | MT334773 | . | A | . | . | A | . | A | G | . | . | . |
| <i>H. spontaneum</i> | L | MT334774 | . | A | . | . | A | . | A | G | . | . | . |
| <i>H. spontaneum</i> | L | MT334775 | G | . | G | . | A | . | A | G | . | . | . |





| Germplasm            | L189P | NCBI ref | H502Y  | R508T  | V510L  |
|----------------------|-------|----------|--------|--------|--------|
|                      |       |          | C1501T | C1520G | G1525C |
| <i>H. spontaneum</i> | P     | MT334696 | C      | G      | G      |
| <i>H. spontaneum</i> | L     | MT334697 | .      | .      | .      |
| <i>H. spontaneum</i> | L     | MT334698 | .      | .      | .      |
| <i>H. spontaneum</i> | L     | MT334699 | .      | .      | C      |
| <i>H. spontaneum</i> | L     | MT334700 | .      | .      | .      |
| <i>H. spontaneum</i> | L     | MT334701 | .      | .      | .      |
| <i>H. spontaneum</i> | L     | MT334702 | .      | .      | .      |
| <i>H. spontaneum</i> | L     | MT334703 | .      | .      | .      |
| <i>H. spontaneum</i> | L     | MT334704 | .      | C      | .      |
| <i>H. spontaneum</i> | L     | MT334705 | .      | C      | .      |
| <i>H. spontaneum</i> | L     | MT334706 | .      | C      | .      |
| <i>H. spontaneum</i> | L     | MT334707 | .      | C      | .      |
| <i>H. spontaneum</i> | L     | MT334708 | T      | .      | C      |
| <i>H. spontaneum</i> | L     | MT334709 | .      | C      | .      |
| <i>H. spontaneum</i> | L     | MT334710 | .      | .      | .      |
| <i>H. spontaneum</i> | L     | MT334711 | .      | .      | .      |
| <i>H. spontaneum</i> | L     | MT334712 | .      | .      | .      |
| <i>H. spontaneum</i> | L     | MT334713 | .      | .      | .      |
| <i>H. spontaneum</i> | L     | MT334714 | .      | .      | .      |
| <i>H. spontaneum</i> | L     | MT334715 | .      | .      | .      |
| <i>H. spontaneum</i> | L     | MT334716 | .      | .      | .      |
| <i>H. spontaneum</i> | L     | MT334717 | .      | .      | .      |
| <i>H. spontaneum</i> | L     | MT334718 | .      | .      | .      |
| <i>H. spontaneum</i> | L     | MT334719 | .      | .      | .      |
| <i>H. spontaneum</i> | L     | MT334720 | .      | .      | .      |
| <i>H. spontaneum</i> | L     | MT334721 | .      | .      | .      |

|                      |       |          |        |        |        |
|----------------------|-------|----------|--------|--------|--------|
| <i>H. spontaneum</i> | L     | MT334722 | .      | .      | .      |
| <i>H. spontaneum</i> | L     | MT334723 | .      | .      | .      |
| <i>H. spontaneum</i> | L     | MT334724 | .      | .      | .      |
| <i>H. spontaneum</i> | L     | MT334725 | .      | .      | .      |
| <i>H. spontaneum</i> | L     | MT334726 | .      | .      | .      |
| <i>H. spontaneum</i> | L     | MT334727 | T      | .      | C      |
| <i>H. spontaneum</i> | L     | MT334728 | T      | .      | C      |
| <i>H. spontaneum</i> | L     | MT334729 | T      | .      | C      |
| <i>H. spontaneum</i> | L     | MT334730 | .      | .      | .      |
| <i>H. spontaneum</i> | L     | MT334731 | .      | .      | .      |
| <i>H. spontaneum</i> | L     | MT334732 | .      | .      | .      |
| <i>H. spontaneum</i> | L     | MT334733 | .      | .      | .      |
| <i>H. spontaneum</i> | L     | MT334734 | .      | .      | .      |
| <i>H. spontaneum</i> | L     | MT334735 | .      | .      | .      |
| <i>H. spontaneum</i> | L     | MT334736 | .      | .      | .      |
| Germplasm            | L189P | NCBI ref | H502Y  | R508T  | V510L  |
|                      |       |          | C1501T | C1520G | G1525C |
| <i>H. spontaneum</i> | L     | MT334737 | .      | .      | .      |
| <i>H. spontaneum</i> | L     | MT334738 | .      | .      | .      |
| <i>H. spontaneum</i> | L     | MT334739 | T      | .      | C      |
| <i>H. spontaneum</i> | L     | MT334740 | T      | .      | C      |
| <i>H. spontaneum</i> | L     | MT334741 | T      | .      | C      |
| <i>H. spontaneum</i> | L     | MT334742 | T      | .      | C      |
| <i>H. spontaneum</i> | L     | MT334743 | .      | .      | .      |
| <i>H. spontaneum</i> | L     | MT334744 | .      | .      | .      |
| <i>H. spontaneum</i> | L     | MT334745 | .      | .      | .      |
| <i>H. spontaneum</i> | L     | MT334746 | .      | .      | .      |
| <i>H. spontaneum</i> | L     | MT334747 | .      | .      | .      |

|                      |   |          |   |   |   |
|----------------------|---|----------|---|---|---|
| <i>H. spontaneum</i> | L | MT334748 | . | . | . |
| <i>H. spontaneum</i> | L | MT334749 | . | . | . |
| <i>H. spontaneum</i> | L | MT334750 | . | . | . |
| <i>H. spontaneum</i> | L | MT334751 | . | . | . |
| <i>H. spontaneum</i> | L | MT334752 | . | . | . |
| <i>H. spontaneum</i> | L | MT334753 | . | . | . |
| <i>H. spontaneum</i> | L | MT334754 | . | . | . |
| <i>H. spontaneum</i> | L | MT334755 | . | . | . |
| <i>H. spontaneum</i> | L | MT334756 | . | . | . |
| <i>H. spontaneum</i> | L | MT334757 | . | . | . |
| <i>H. spontaneum</i> | L | MT334758 | . | . | . |
| <i>H. spontaneum</i> | L | MT334759 | . | C | . |
| <i>H. spontaneum</i> | L | MT334760 | . | C | . |
| <i>H. spontaneum</i> | L | MT334761 | . | C | . |
| <i>H. spontaneum</i> | L | MT334762 | . | C | . |
| <i>H. spontaneum</i> | L | MT334763 | . | C | . |
| <i>H. spontaneum</i> | L | MT334764 | . | C | . |
| <i>H. spontaneum</i> | L | MT334765 | . | C | . |
| <i>H. spontaneum</i> | L | MT334766 | . | C | . |
| <i>H. spontaneum</i> | L | MT334767 | . | . | . |
| <i>H. spontaneum</i> | L | MT334768 | . | . | . |
| <i>H. spontaneum</i> | L | MT334769 | . | . | . |
| <i>H. spontaneum</i> | L | MT334770 | . | . | . |
| <i>H. spontaneum</i> | L | MT334771 | . | . | . |
| <i>H. spontaneum</i> | L | MT334772 | . | . | . |
| <i>H. spontaneum</i> | L | MT334773 | . | . | . |
| <i>H. spontaneum</i> | L | MT334774 | . | . | . |
| <i>H. spontaneum</i> | L | MT334775 | . | C | . |

---



**Supplementary Table 4:** Primers used for sanger sequencing, qPCR and In-situ

| Application       | Name              | Sequence              | Size | T <sub>a</sub> (°C) |
|-------------------|-------------------|-----------------------|------|---------------------|
| Sanger sequencing | HvHKT1;5_1F       | AGCCACTTGTCAGTCGTAG   | 899  | 55                  |
|                   | HvHKT1;5_1R       | CTGGTCCTTGAACCCTTGCT  |      |                     |
|                   | HvHKT1;5_3F       | CCTGATCTTCACGTCGGTGT  | 859  | 55                  |
|                   | HvHKT1;5_3R       | CCTCGAGTTGACCGACATGA  |      |                     |
|                   | HvHKT1;5_5F       | CTCCTCGGAAACACGCTCT   | 869  | 55                  |
|                   | HvHKT1;5_5R       | TTCCCTCCCTGCTCCACTT   |      |                     |
|                   | HvHKT1;5_7F       | GCACAAGCTTCTCATGTGCG  | 682  | 55                  |
|                   | HvHKT1;5_7R       | GAGCCCGCTTACCTTCTCTC  |      |                     |
| qPCR              | HvHKT1;5_Q_2F     | GCAGATCTCCGATGACCCA   | 175  | 65                  |
|                   | HvHKT1;5_Q_2R     | TGAGCCTGCCGTAGAACATG  |      |                     |
| In-situ           | Insitu_HvHKT1;5_F | TGGTCATGATGTACCTACCA  |      |                     |
|                   | Insitu_HvHKT1;5_R | GTACGCACTGATAACCTCGA  |      |                     |
|                   | Insitu_Hv18s_F    | ATGGCTCATTAAATCAGTTAT |      |                     |
|                   | Insitu_Hv18s_R    | AATATACGCTATTGGAGCTGG |      |                     |

**Supplementary Table 5:** Na<sup>+</sup> contents of 5th leaf material from 0mM, 150mM and 250mM NaCl treated plants.

| <i>HvHKT1;5</i> haplotype       | Cultivar Name  | Treatment   | Mean Na (mg/kg) |
|---------------------------------|----------------|-------------|-----------------|
| Na <sup>+</sup> <sub>HAP1</sub> | Golden Promise | 0 mM NaCl   | 574.4           |
| Na <sup>+</sup> <sub>HAP2</sub> | Viivi          | 0 mM NaCl   | 423.3           |
| Na <sup>+</sup> <sub>HAP3</sub> | Morex          | 0 mM NaCl   | 470.3           |
| Na <sup>+</sup> <sub>HAP1</sub> | Golden Promise | 150 mM NaCl | 3601.4          |
| Na <sup>+</sup> <sub>HAP2</sub> | Viivi          | 150 mM NaCl | 3201.9          |
| Na <sup>+</sup> <sub>HAP3</sub> | Morex          | 150 mM NaCl | 7677.0          |
| Na <sup>+</sup> <sub>HAP1</sub> | Golden Promise | 250 mM NaCl | 6953.1          |
| Na <sup>+</sup> <sub>HAP2</sub> | Viivi          | 250 mM NaCl | 5555.8          |
| Na <sup>+</sup> <sub>HAP3</sub> | Morex          | 250 mM NaCl | 11054.3         |

**Supplementary dataset: Influence of growth in 0mM, 150mM and 250mM on a range of phenotypic traits**

**Biomass and Grain Data set sample numbers**

*Treatment*

| Treatment   | Biomass<br>Data<br>Freq | Grain<br>Data<br>Freq |
|-------------|-------------------------|-----------------------|
| Control     | 39                      | 31                    |
| 150 mM NaCl | 40                      | 28                    |
| 250 mM NaCl | 38                      | 23                    |

*Allele, haplotype and line*

| Allele | Haplotype | Line       | Freq<br>Biomass<br>Data | Freq<br>Grain<br>Data |
|--------|-----------|------------|-------------------------|-----------------------|
| L      | Hap1      | Aapo       | 15                      | 11                    |
| L      | Hap1      | GP         | 15                      | 12                    |
| L      | Hap1      | Rasa       | 15                      | 8                     |
| L      | Hap1      | Tyne       | 15                      | 9                     |
| L      | Hap2      | Viivi      | 15                      | 10                    |
| P      | Hap3      | Ida        | 14                      | 10                    |
| P      | Hap3      | Maris_Mink | 15                      | 13                    |
| P      | Hap3      | Ruja       | 13                      | 9                     |

**Shoot data set sample numbers**

*Treatment*

| Treatment   | Freq |
|-------------|------|
| Control     | 21   |
| 150 mM NaCl | 20   |
| 250 mM NaCl | 20   |

*Line by Allele*

| Allele | Line           | Freq |
|--------|----------------|------|
| L      | Golden_promise | 20   |
| L      | Viivi          | 21   |
| P      | Morex          | 20   |



## Analysis of phenotypic traits

There is confounding between Allele (2 levels), Haplotype (3 levels) and Line (8 levels) as one particular line can only have a single allele and haplotype-so essentially there are only 8 combinations of allele, haplotype and line. When fitting a model it is therefore not possible to fit a crossed interaction between these 3 factors as many of the combinations do not exist within the data set. The treatment structure for these 3 factors needs to be nested: Allele/Haplotypes/Lines. So lines are within haplotypes, which are within alleles.

The linear model approach presented aims to isolate whether the differences in trait are attributable to the alleles, haplotypes within alleles or lines within haplotypes within alleles or their interactions.

Salt treatment is also of interest, therefore a nested treatment structure between factors Allele, Haplotypes and Lines crossed with the salt Treatment can be used. The terms in the model are as follows:

### *Terms in the model*

| Term                            | Interpretation      | df |
|---------------------------------|---------------------|----|
| (Intercept)                     | Overall mean        | 1  |
| Allele                          | Allele              | 1  |
| Treatment                       | Treatment           | 2  |
| Allele:Haplotype                | Haplotype           | 1  |
| Allele:Treatment                | Allele:Treatment    | 2  |
| Allele:Haplotype:Line           | Line                | 5  |
| Allele:Haplotype:Treatment      | Haplotype:Treatment | 2  |
| Allele:Haplotype:Line:Treatment | Line:Treatment      | 10 |

For the shoot Na, only three lines were included in the experiment, therefore Haplotype and Line are completely confounded and only one can be included in the model. The terms in the model are as follows:

### *Terms in the model*

| Term                       | Interpretation      | df |
|----------------------------|---------------------|----|
| (Intercept)                | Overall Mean        | 1  |
| Allele                     | Allele              | 1  |
| Treatment                  | Treatment           | 2  |
| Allele:Haplotype           | Haplotype           | 1  |
| Allele:Treatment           | Allele:Treatment    | 2  |
| Allele:Haplotype:Treatment | Haplotype:Treatment | 2  |

Significance was tested at the 5% level. In general, terms in a model should be tested in a hierarchical manner, however, because of the confounding in this model there are exceptions to this. For example, the three-way interaction Allele:Haplotype:Treatment and the two way interaction Allele:Treatment can be examined simultaneously with the 4-way interaction. In addition, because of confounding there is an alternative interpretation of some terms. For example, the three-way interaction between Allele, Haplotype and Line can be interpreted as a line effect and the two way interaction between Allele and Haplotype corresponds to haplotype effects. Because of the difficult in interpretation of relevant significant terms, in the Anova tables below, terms highlighted are the appropriate significant terms for interpretation.

ASReml-R which uses a REML approach was used for analysis because of the unbalanced nature of the data. Anova tables presented are from ASReml. For some lower order terms predicted values were not available from ASReml due to missing treatment combinations. For these terms predicted values were obtained using a linear regression model in Genstat. For consistency, if lower order terms were significant, all predicted values available are from a linear regression model conducted in Genstat. Differences between treatment levels was determined by Tukeys if the standard error of difference variance covariance matrix was available or by a Bonferonni corrected LSD (least significant difference) if just the average standard error of difference was available.

## **Biomass**

There is a significant three-way interaction between Allele, Haplotype and Line and therefore the trait differs between lines. There is a significant interaction between Allele and Haplotype (borderline) and there is also a main effect of Treatment and of Allele. The treatment effect is independent of allele, haplotype and line. All predicted values are from Genstat regression.

*Anova Table: Biomass*

| Term                            | Df | Sum of Sq   | Wald<br>statistic | Pr(Chisq) |
|---------------------------------|----|-------------|-------------------|-----------|
| Allele                          | 1  | 17.3170719  | 10.3121835        | 0.0013215 |
| Treatment                       | 2  | 240.7291349 | 143.3523542       | 0.0000000 |
| Allele:Haplotype                | 1  | 6.5975704   | 3.9288026         | 0.0474657 |
| Allele:Treatment                | 2  | 3.3946952   | 2.0215150         | 0.3639432 |
| Allele:Haplotype:Line           | 5  | 22.2350352  | 13.2407930        | 0.0212238 |
| Allele:Haplotype:Treatment      | 2  | 0.2980298   | 0.1774745         | 0.9150860 |
| Allele:Haplotype:Line:Treatment | 10 | 17.4613580  | 10.3981048        | 0.4062873 |

*Predicted Values (Allele by Haplotype by) Line: Biomass*

| Allele | Haplotype | Line       | Predicted value | Std error | Group* |
|--------|-----------|------------|-----------------|-----------|--------|
| L      | Hap1      | Aapo       | 7.518           | 0.33467   | abc    |
| L      | Hap1      | GP         | 7.243           | 0.33467   | ab     |
| L      | Hap1      | Rasa       | 6.823           | 0.33467   | a      |
| L      | Hap1      | Tyne       | 6.688           | 0.33467   | a      |
| L      | Hap2      | Viivi      | 7.807           | 0.33467   | abc    |
| P      | Hap3      | Ida        | 7.125           | 0.34765   | ab     |
| P      | Hap3      | Maris_Mink | 8.195           | 0.33467   | bc     |
| P      | Hap3      | Ruja       | 8.508           | 0.36082   | b      |

*\*predicted mean values compared with bonferonni corrected LSD*

*Predicted Values Treatment: Biomass*

| Treatment   | Predicted value | Std error | Group* |
|-------------|-----------------|-----------|--------|
| Control     | 7.518           | 0.2297    | a      |
| 150 mM NaCl | 8.814           | 0.2290    | b      |
| 250 mM NaCl | 5.423           | 0.2306    | c      |

*\*predicted mean values compared with bonferonni corrected LSD*

*Predicted Values Haplotype: Biomass*

| Allele | Haplotype | Predicted value | Std error | Group* |
|--------|-----------|-----------------|-----------|--------|
| L      | Hap1      | 7.068           | 0.1673    | a      |
| L      | Hap2      | 7.807           | 0.3347    | b      |
| P      | Hap3      | 7.935           | 0.2005    | b      |

*\*predicted mean values compared by bonferonni corrected LSD*

*Predicted Values Allele: Biomass*

| Allele | Predicted value | Std error |
|--------|-----------------|-----------|
| L      | 7.111           | 0.2557    |
| P      | 7.935           | 0.2557    |

## Ear weight

There is a significant four-way interaction between Allele, Haplotype, Line and Treatment. Therefore the ear weight depends on the line and on the treatment.

*Anova Table: Ear weight*

| Term                            | Df | Sum of Sq  | Wald<br>statistic | Pr(Chisq) |
|---------------------------------|----|------------|-------------------|-----------|
| Allele                          | 1  | 0.5417924  | 0.2075091         | 0.6487268 |
| Treatment                       | 2  | 95.5848289 | 36.6094558        | 0.0000000 |
| Allele:Haplotype                | 1  | 9.0859323  | 3.4799564         | 0.0621164 |
| Allele:Treatment                | 2  | 10.9303008 | 4.1863585         | 0.1232945 |
| Allele:Haplotype:Line           | 5  | 44.8262946 | 17.1686895        | 0.0041907 |
| Allele:Haplotype:Treatment      | 2  | 5.4976098  | 2.1056114         | 0.3489573 |
| Allele:Haplotype:Line:Treatment | 10 | 65.9813122 | 25.2711645        | 0.0048545 |

*Predicted Values (Allele by Haplotype by) Line by Treatment: Ear weight*

| Allele | Haplotype | Line | Treatment      | Predicted<br>value | Std error | Group* |
|--------|-----------|------|----------------|--------------------|-----------|--------|
| L      | Hap1      | Aapo | Control        | 4.03220            | 0.7226248 | abcd   |
| L      | Hap1      | Aapo | 150 mM<br>NaCl | 3.95380            | 0.7226248 | abcd   |
| L      | Hap1      | Aapo | 250 mM<br>NaCl | 2.16000            | 0.7226248 | abc    |
| L      | Hap1      | GP   | Control        | 1.61380            | 0.7226248 | ab     |
| L      | Hap1      | GP   | 150 mM<br>NaCl | 5.43260            | 0.7226248 | bcd    |
| L      | Hap1      | GP   | 250 mM<br>NaCl | 2.52100            | 0.7226248 | abc    |
| L      | Hap1      | Rasa | Control        | 3.64140            | 0.7226248 | abcd   |
| L      | Hap1      | Rasa | 150 mM<br>NaCl | 5.45900            | 0.7226248 | cd     |
| L      | Hap1      | Rasa | 250 mM<br>NaCl | 3.47240            | 0.7226248 | abcd   |
| L      | Hap1      | Tyne | Control        | 6.37020            | 0.7226248 | d      |
| L      | Hap1      | Tyne | 150 mM<br>NaCl | 6.42920            | 0.7226248 | d      |

|   |      |            |             |         |           |      |
|---|------|------------|-------------|---------|-----------|------|
| L | Hap1 | Tyne       | 250 mM NaCl | 2.75220 | 0.7226248 | abcd |
| L | Hap2 | Viivi      | Control     | 3.99380 | 0.7226248 | abcd |
| L | Hap2 | Viivi      | 150 mM NaCl | 3.86900 | 0.7226248 | abcd |
| L | Hap2 | Viivi      | 250 mM NaCl | 1.48620 | 0.7226248 | a    |
| P | Hap3 | Ida        | Control     | 5.26840 | 0.7226248 | abcd |
| P | Hap3 | Ida        | 150 mM NaCl | 3.04540 | 0.7226248 | abcd |
| P | Hap3 | Ida        | 250 mM NaCl | 2.42975 | 0.8079191 | abcd |
| P | Hap3 | Maris_Mink | Control     | 4.39020 | 0.7226248 | abcd |
| P | Hap3 | Maris_Mink | 150 mM NaCl | 5.74300 | 0.7226248 | cd   |
| P | Hap3 | Maris_Mink | 250 mM NaCl | 2.30740 | 0.7226248 | abc  |
| P | Hap3 | Ruja       | Control     | 3.22350 | 0.8079191 | abcd |
| P | Hap3 | Ruja       | 150 mM NaCl | 3.17660 | 0.7226248 | abcd |
| P | Hap3 | Ruja       | 250 mM NaCl | 2.97425 | 0.8079191 | abcd |

*\*predicted mean values compared with tukeys*

### **Biomass Combined with ear weight**

There is a significant four-way interaction between Allele, Haplotype, Line and Treatment. Therefore the biomass combined with ear weight depends on both the line and the treatment with a non-additive interaction.

*Anova Table: Biomass Combined with ear weight*

| Term                  | Df | Sum of Sq    | Wald statistic | Pr(Chisq) |
|-----------------------|----|--------------|----------------|-----------|
| Allele                | 1  | 1.173277e+01 | 2.6159346      | 0.1057952 |
| Treatment             | 2  | 6.374063e+02 | 142.1159035    | 0.0000000 |
| Allele:Haplotype      | 1  | 1.986613e-01 | 0.0442935      | 0.8333086 |
| Allele:Treatment      | 2  | 9.229523e+00 | 2.0578115      | 0.3573978 |
| Allele:Haplotype:Line | 5  | 3.632991e+01 | 8.1001046      | 0.1508043 |

Allele:Haplotype:Treatment      2 7.982469e+00      1.7797688 0.4107032  
 Allele:Haplotype:Line:Treatment 10 9.648986e+01      21.5133476 0.0177851

*Predicted Values (Allele by Haplotype by) line by treatment: Biomass Combined with ear weight*

| Allele | Haplotype | Line       | Treatment   | Predicted value | Std error | Group* |
|--------|-----------|------------|-------------|-----------------|-----------|--------|
| L      | Hap1      | Aapo       | Control     | 11.51860        | 0.9471131 | abcdef |
| L      | Hap1      | Aapo       | 150 mM NaCl | 12.97100        | 0.9471131 | bcdef  |
| L      | Hap1      | Aapo       | 250 mM NaCl | 8.13340         | 0.9471131 | ab     |
| L      | Hap1      | GP         | Control     | 8.80900         | 0.9471131 | abcd   |
| L      | Hap1      | GP         | 150 mM NaCl | 14.23520        | 0.9471131 | ef     |
| L      | Hap1      | GP         | 250 mM NaCl | 8.17160         | 0.9471131 | ab     |
| L      | Hap1      | Rasa       | Control     | 10.81800        | 0.9471131 | abcde  |
| L      | Hap1      | Rasa       | 150 mM NaCl | 13.76160        | 0.9471131 | def    |
| L      | Hap1      | Rasa       | 250 mM NaCl | 8.37360         | 0.9471131 | ab     |
| L      | Hap1      | Tyne       | Control     | 13.49560        | 0.9471131 | cdef   |
| L      | Hap1      | Tyne       | 150 mM NaCl | 14.54280        | 0.9471131 | ef     |
| L      | Hap1      | Tyne       | 250 mM NaCl | 7.49040         | 0.9471131 | a      |
| L      | Hap2      | Viivi      | Control     | 12.15540        | 0.9471131 | abcdef |
| L      | Hap2      | Viivi      | 150 mM NaCl | 12.96200        | 0.9471131 | bcdef  |
| L      | Hap2      | Viivi      | 250 mM NaCl | 7.57680         | 0.9471131 | a      |
| P      | Hap3      | Ida        | Control     | 13.04420        | 0.9471131 | bcdef  |
| P      | Hap3      | Ida        | 150 mM NaCl | 11.01880        | 0.9471131 | abcde  |
| P      | Hap3      | Ida        | 250 mM NaCl | 7.99300         | 1.0589046 | ab     |
| P      | Hap3      | Maris_Mink | Control     | 12.35120        | 0.9471131 | abcdef |

|   |      |            |             |          |           |        |
|---|------|------------|-------------|----------|-----------|--------|
| P | Hap3 | Maris_Mink | 150 mM NaCl | 16.14020 | 0.9471131 | f      |
| P | Hap3 | Maris_Mink | 250 mM NaCl | 8.42520  | 0.9471131 | ab     |
| P | Hap3 | Ruja       | Control     | 12.69000 | 1.0589046 | abcdef |
| P | Hap3 | Ruja       | 150 mM NaCl | 13.86180 | 0.9471131 | ef     |
| P | Hap3 | Ruja       | 250 mM NaCl | 8.20725  | 1.0589046 | abc    |

*\*predicted mean values compared with tukeys*

## TGW

There is a significant three-way interaction between Allele, Haplotype and Line and between Allele and Treatment.

*Anova Table: TGW*

| Term                            | Df | Sum of Sq  | Wald statistic | Pr(Chisq) |
|---------------------------------|----|------------|----------------|-----------|
| Allele                          | 1  | 10.34065   | 0.1274180      | 0.7211243 |
| Treatment                       | 2  | 558.85998  | 6.8863022      | 0.0319638 |
| Allele:Haplotype                | 1  | 126.85402  | 1.5631019      | 0.2112116 |
| Allele:Treatment                | 2  | 986.99781  | 12.1618390     | 0.0022861 |
| Allele:Haplotype:Line           | 5  | 1190.09690 | 14.6644368     | 0.0118966 |
| Allele:Haplotype:Treatment      | 2  | 21.45482   | 0.2643674      | 0.8761800 |
| Allele:Haplotype:Line:Treatment | 10 | 1202.71240 | 14.8198857     | 0.1387678 |

*Predicted Values (Allele by Haplotype by) Line: TGW*

| Allele | Haplotype | Line       | Predicted value | Std error | Group* |
|--------|-----------|------------|-----------------|-----------|--------|
| L      | Hap1      | Aapo       | 40.433          | 2.3265    | b      |
| L      | Hap1      | GP         | 30.658          | 2.3265    | a      |
| L      | Hap1      | Rasa       | 38.521          | 2.3265    | b      |
| L      | Hap1      | Tyne       | 34.419          | 2.3265    | ab     |
| L      | Hap2      | Viivi      | 39.285          | 2.3265    | b      |
| P      | Hap3      | Ida        | 36.752          | 2.4168    | ab     |
| P      | Hap3      | Maris_Mink | 32.606          | 2.3265    | ab     |

P Hap3 Ruja 39.577 2.5083 b  
*\*predicted mean values compared with corrected bonferonni LSD*

*Predicted Values Allele by Treatment: TGW*

| Allele | Treatment   | Predicted value | Std error | Group* |
|--------|-------------|-----------------|-----------|--------|
| L      | Control     | 33.13           | 1.911     | a      |
| L      | 150 mM NaCl | 42.02           | 1.911     | a      |
| L      | 250 mM NaCl | 33.23           | 1.911     | a      |
| P      | Control     | 35.69           | 2.412     | a      |
| P      | 150 mM NaCl | 33.96           | 2.330     | a      |
| P      | 250 mM NaCl | 38.91           | 2.504     | a      |

*\*predicted mean values compared with bonferonni corrected LSD*

**Area**

There is a significant three-way interaction between Allele, Haplotype and Line and the two-way interaction between Allele and Treatment effect and between Allele and Haplotype.

*Anova Table: Area Anova Table: Area*

| Term                            | Df | Sum of Sq    | Wald statistic | Pr(Chisq) |
|---------------------------------|----|--------------|----------------|-----------|
| Allele                          | 1  | 3.895407e-01 | 8.517500e-02   | 0.7704031 |
| Treatment                       | 2  | 9.862775e+00 | 2.156545e+00   | 0.3401826 |
| Allele:Haplotype                | 1  | 1.276616e+02 | 2.791386e+01   | 0.0000001 |
| Allele:Treatment                | 2  | 3.302763e+01 | 7.221657e+00   | 0.0270294 |
| Allele:Haplotype:Line           | 5  | 9.551324e+01 | 2.088445e+01   | 0.0008518 |
| Allele:Haplotype:Treatment      | 2  | 2.041867e+00 | 4.464644e-01   | 0.7999291 |
| Allele:Haplotype:Line:Treatment | 10 | 5.998659e+01 | 1.311637e+01   | 0.2172380 |

*Predicted Values (Allele by Haplotype by) Line: Area*

| Allele | Haplotype | Line | Predicted value | Std error | Group* |
|--------|-----------|------|-----------------|-----------|--------|
| L      | Hap1      | Aapo | 22.604          | 0.55229   | cd     |
| L      | Hap1      | GP   | 20.159          | 0.55229   | a      |
| L      | Hap1      | Rasa | 21.296          | 0.55229   | abc    |
| L      | Hap1      | Tyne | 20.097          | 0.55229   | a      |



|   |      |            |        |         |    |
|---|------|------------|--------|---------|----|
| L | Hap2 | Viivi      | 24.292 | 0.55229 | d  |
| P | Hap3 | Ida        | 22.180 | 0.57372 | bc |
| P | Hap3 | Maris_Mink | 20.680 | 0.55229 | ab |
| P | Hap3 | Ruja       | 22.797 | 0.59545 | cd |

*\*predicted mean values compared with bonferonni corrected LSD*

*Predicted Values Allele by Treatment: Area*

| Allele | Treatment   | Predicted value | Std error | Group* |
|--------|-------------|-----------------|-----------|--------|
| L      | Control     | 20.84           | 0.4536    | a      |
| L      | 150 mM NaCl | 22.20           | 0.4536    | a      |
| L      | 250 mM NaCl | 20.61           | 0.4536    | a      |
| P      | Control     | 21.67           | 0.5726    | a      |
| P      | 150 mM NaCl | 21.31           | 0.5531    | a      |
| P      | 250 mM NaCl | 22.56           | 0.5943    | a      |

*\*predicted mean values compared with bonferonni corrected LSD*

*Predicted Values (Allele by) Haplotype: Area*

| Allele | Haplotype | Predicted value | Std error | Group* |
|--------|-----------|-----------------|-----------|--------|
| L      | Hap1      | 21.04           | 0.2761    | a      |
| L      | Hap2      | 24.29           | 0.5523    | b      |
| P      | Hap3      | 21.84           | 0.3308    | a      |

*\*predicted mean values compared with bonferonni corrected LSD*

**Width**

There is a significant interaction between allele and treatment.

*Anova Table: Width*

| Term             | Df | Sum of Sq | Wald statistic | Pr(Chisq) |
|------------------|----|-----------|----------------|-----------|
| Allele           | 1  | 0.0265934 | 3.090325e-01   | 0.5782745 |
| Treatment        | 2  | 0.1189233 | 1.381965e+00   | 0.5010836 |
| Allele:Haplotype | 1  | 0.0833333 | 9.683869e-01   | 0.3250828 |
| Allele:Treatment | 2  | 0.5880284 | 6.833268e+00   | 0.0328227 |

|                                 |    |           |              |           |
|---------------------------------|----|-----------|--------------|-----------|
| Allele:Haplotype:Line           | 5  | 0.8446874 | 9.815810e+00 | 0.0806256 |
| Allele:Haplotype:Treatment      | 2  | 0.0330667 | 3.842559e-01 | 0.8252013 |
| Allele:Haplotype:Line:Treatment | 10 | 1.2746752 | 1.481255e+01 | 0.1390471 |

*Predicted Values Allele by Treatment: Width*

| Allele | Treatment   | Predicted value | Std error | Group* |
|--------|-------------|-----------------|-----------|--------|
| L      | Control     | 3.136           | 0.06222   | a      |
| L      | 150 mM NaCl | 3.311           | 0.06222   | a      |
| L      | 250 mM NaCl | 3.098           | 0.06222   | a      |
| P      | Control     | 3.194           | 0.07854   | a      |
| P      | 150 mM NaCl | 3.083           | 0.07587   | a      |
| P      | 250 mM NaCl | 3.230           | 0.08153   | a      |

*\*predicted mean values compared with bonferonni corrected LSD*

**Length**

There is significant three-way interactions between Allele, Haplotype and Treatment and between Allele, Haplotype and Line.

*Anova Table: Length*

| Term                            | Df | Sum of Sq  | Wald statistic | Pr(Chisq) |
|---------------------------------|----|------------|----------------|-----------|
| Allele                          | 1  | 0.1047680  | 6.900687e-01   | 0.4061410 |
| Treatment                       | 2  | 0.0501037  | 3.300145e-01   | 0.8478876 |
| Allele:Haplotype                | 1  | 13.0208333 | 8.576348e+01   | 0.0000000 |
| Allele:Treatment                | 2  | 0.1207161  | 7.951131e-01   | 0.6719599 |
| Allele:Haplotype:Line           | 5  | 3.1422507  | 2.069686e+01   | 0.0009241 |
| Allele:Haplotype:Treatment      | 2  | 0.9760667  | 6.428995e+00   | 0.0401755 |
| Allele:Haplotype:Line:Treatment | 10 | 0.8202914  | 5.402960e+00   | 0.8626875 |

*Predicted Values (Allele by Haplotype by) Line: Length*

| Allele | Haplotype | Line | Predicted value | Std error | Group* |
|--------|-----------|------|-----------------|-----------|--------|
| L      | Hap1      | Aapo | 8.768           | 0.10063   | c      |

|   |      |            |       |         |     |
|---|------|------------|-------|---------|-----|
| L | Hap1 | GP         | 8.339 | 0.10063 | a   |
| L | Hap1 | Rasa       | 8.389 | 0.10063 | ab  |
| L | Hap1 | Tyne       | 8.236 | 0.10063 | a   |
| L | Hap2 | Viivi      | 9.470 | 0.10063 | d   |
| P | Hap3 | Ida        | 8.864 | 0.10453 | c   |
| P | Hap3 | Maris_Mink | 8.565 | 0.10063 | abc |
| P | Hap3 | Ruja       | 8.683 | 0.10849 | abc |

*\*predicted mean values compared with bonferonni corrected LSD*

*Predicted Values (Allele by) Haplotype by Treatment: Length*

| Allele | Haplotype | Treatment   | Predicted value | Std error | Group |
|--------|-----------|-------------|-----------------|-----------|-------|
| L      | Hap1      | Control     | 8.460           | 0.08713   | a     |
| L      | Hap1      | 150 mM NaCl | 8.500           | 0.08713   | a     |
| L      | Hap1      | 250 mM NaCl | 8.335           | 0.08713   | a     |
| L      | Hap2      | Control     | 9.300           | 0.17425   | b     |
| L      | Hap2      | 150 mM NaCl | 9.340           | 0.17425   | b     |
| L      | Hap2      | 250 mM NaCl | 9.780           | 0.17425   | b     |
| P      | Hap3      | Control     | 8.634           | 0.10432   | a     |
| P      | Hap3      | 150 mM NaCl | 8.687           | 0.10078   | a     |
| P      | Hap3      | 250 mM NaCl | 8.786           | 0.10829   | a     |

*\*predicted mean values compared with bonferonni corrected LSD*

### **Grain Na**

A square root transformations for Grain Na was necessary in order to meet model assumptions. There is a significant four way interaction between Allele, Haplotype, Line and treatment. Therefore the Grain Na changes depending on the line and treatment. There is also a significant two-way interaction between Allele and Treatment and between Allele and Haplotype

Anova Table: Grain Na

| Term                            | Df | Sum of Sq  | Wald statistic | Pr(Chisq) |
|---------------------------------|----|------------|----------------|-----------|
| Allele                          | 1  | 5801.32847 | 134.599678     | 0.0000000 |
| Treatment                       | 2  | 1293.23865 | 30.005111      | 0.0000003 |
| Allele:Haplotype                | 1  | 213.27734  | 4.948360       | 0.0261154 |
| Allele:Treatment                | 2  | 1034.18945 | 23.994774      | 0.0000062 |
| Allele:Haplotype:Line           | 5  | 2587.21671 | 60.027378      | 0.0000000 |
| Allele:Haplotype:Treatment      | 2  | 50.30663   | 1.167191       | 0.5578890 |
| Allele:Haplotype:Line:Treatment | 10 | 1549.98297 | 35.961971      | 0.0000855 |

Back Transformed Predicted Values for (Allele by Haplotype by) Line by treatment: Grain Na

| Allele | Haplotype | Line | Treatment   | Predicted value | Std error | groups | Back transformed predicted value | Back transformed Std error |
|--------|-----------|------|-------------|-----------------|-----------|--------|----------------------------------|----------------------------|
| L      | Hap1      | Aapo | Control     | 14.48421        | 2.936005  | ab     | 209.7922                         | 85.05139                   |
| L      | Hap1      | Aapo | 150 mM NaCl | 18.68596        | 3.790366  | ab     | 349.1649                         | 141.65320                  |
| L      | Hap1      | Aapo | 250 mM NaCl | 17.69716        | 3.790366  | ab     | 313.1894                         | 134.15740                  |
| L      | Hap1      | GP   | Control     | 17.31248        | 2.936005  | ab     | 299.7220                         | 101.65905                  |
| L      | Hap1      | GP   | 150 mM NaCl | 20.73275        | 3.282553  | ab     | 429.8469                         | 136.11270                  |
| L      | Hap1      | GP   | 250 mM NaCl | 23.69988        | 3.790366  | ab     | 561.6842                         | 179.66240                  |
| L      | Hap1      | Rasa | Control     | 15.40053        | 3.790366  | ab     | 237.1763                         | 116.74727                  |
| L      | Hap1      | Rasa | 150 mM NaCl | 15.34165        | 3.790366  | ab     | 235.3663                         | 116.30093                  |
| L      | Hap1      | Rasa | 250 mM NaCl | 13.27139        | 4.642231  | ab     | 176.1297                         | 123.21767                  |
| L      | Hap1      | Tyne | Control     | 15.97358        | 3.282553  | ab     | 255.1552                         | 104.86823                  |

|   |      |                    |             |              |              |    |           |           |
|---|------|--------------------|-------------|--------------|--------------|----|-----------|-----------|
| L | Hap1 | Tyne               | 150 mM NaCl | 18.8976<br>6 | 3.79036<br>6 | ab | 357.1216  | 143.25809 |
| L | Hap1 | Tyne               | 250 mM NaCl | 24.8387<br>1 | 4.64223<br>1 | ab | 616.9616  | 230.61405 |
| L | Hap2 | Viivi              | Control     | 13.9378<br>4 | 3.79036<br>6 | ab | 194.2633  | 105.65900 |
| L | Hap2 | Viivi              | 150 mM NaCl | 10.4970<br>7 | 3.79036<br>6 | a  | 110.1884  | 79.57545  |
| L | Hap2 | Viivi              | 250 mM NaCl | 16.0636<br>3 | 3.28255<br>3 | ab | 258.0403  | 105.45944 |
| P | Hap3 | Ida                | Control     | 22.6452<br>8 | 3.79036<br>6 | ab | 512.8089  | 171.66780 |
| P | Hap3 | Ida                | 150 mM NaCl | 31.1419<br>2 | 3.28255<br>3 | b  | 969.8190  | 204.44997 |
| P | Hap3 | Ida                | 250 mM NaCl | 27.0255<br>4 | 3.79036<br>6 | ab | 730.3798  | 204.87335 |
| P | Hap3 | Marri<br>s<br>Mink | Control     | 22.8204<br>1 | 2.93600<br>5 | ab | 520.7712  | 134.00166 |
| P | Hap3 | Marri<br>s<br>Mink | 150 mM NaCl | 53.4299<br>2 | 2.93600<br>5 | c  | 2854.7563 | 313.74097 |
| P | Hap3 | Marri<br>s<br>Mink | 250 mM NaCl | 63.3318<br>5 | 3.79036<br>6 | c  | 4010.9238 | 480.10175 |
| P | Hap3 | Ruja               | Control     | 21.9955<br>0 | 3.79036<br>6 | ab | 483.8020  | 166.74196 |
| P | Hap3 | Ruja               | 150 mM NaCl | 30.5067<br>4 | 3.79036<br>6 | ab | 930.6611  | 231.26338 |
| P | Hap3 | Ruja               | 250 mM NaCl | 30.8811<br>6 | 3.79036<br>6 | ab | 953.6458  | 234.10174 |

*\*predicted mean values on transformed scale compared with tukeys*

*Back Transformed Predicted Values for (Allele by) Treatment: Grain Na*

| Allele | Treatment | Predicted value | Std error | Group* | Back transformed predicted value | Back transformed Std error |
|--------|-----------|-----------------|-----------|--------|----------------------------------|----------------------------|
| L      | Control   | 15.74           | 1.519     | a      | 247.75                           | 47.82                      |

|   |             |       |       |   |         |        |
|---|-------------|-------|-------|---|---------|--------|
| L | 150 mM NaCl | 18.20 | 1.739 | a | 331.24  | 63.30  |
| L | 250 mM NaCl | 19.98 | 1.969 | a | 399.20  | 78.68  |
| P | Control     | 22.53 | 1.991 | a | 507.60  | 89.71  |
| P | 150 mM NaCl | 40.02 | 1.900 | b | 1601.60 | 152.08 |
| P | 250 mM NaCl | 42.86 | 2.216 | b | 1836.98 | 189.96 |

\* predicted mean values on transformed scale compared with bonferonni corrected LSD

Back Transformed Predicted Values for (Allele by) Haplotype: Grain Na

| Allele | Haplotype | Predicted value | Std error | Group* | Back transformed predicted value | Back transformed Std error |
|--------|-----------|-----------------|-----------|--------|----------------------------------|----------------------------|
| L      | Hap1      | 18.04           | 1.0472    | a      | 325.44                           | 37.78                      |
| L      | Hap2      | 13.36           | 2.1392    | b      | 178.49                           | 57.16                      |
| P      | Hap3      | 34.20           | 1.1720    | c      | 1169.64                          | 80.16                      |

\*predicted mean values on transformed scale compared with bonferonni corrected LSD

### Grain K

There is a significant treatment effect. Allele, Haplotype and Line are not significant.

Anova Table: Grain K

| Term                            | Df | Sum of Sq    | Wald statistic | Pr(Chisq) |
|---------------------------------|----|--------------|----------------|-----------|
| Allele                          | 1  | 2.639048e+06 | 2.4878311      | 0.1147297 |
| Treatment                       | 2  | 8.649643e+06 | 8.1540218      | 0.0169581 |
| Allele:Haplotype                | 1  | 5.751935e+05 | 0.5422351      | 0.4615079 |
| Allele:Treatment                | 2  | 5.369355e+03 | 0.0050617      | 0.9974724 |
| Allele:Haplotype:Line           | 5  | 7.656622e+06 | 7.2179002      | 0.2049326 |
| Allele:Haplotype:Treatment      | 2  | 1.365310e+06 | 1.2870778      | 0.5254297 |
| Allele:Haplotype:Line:Treatment | 10 | 7.635811e+06 | 7.1982817      | 0.7066027 |

*Predicted Values treatment: Grain K*

| Treatment   | Predicted value | Std error | Group* |
|-------------|-----------------|-----------|--------|
| Control     | 7751            | 192.7     | a      |
| 150 mM NaCl | 7329            | 213.7     | ab     |
| 250 mM NaCl | 7077            | 243.0     | b      |

\* predicted mean values of salt treatment compared to control with LSD.

**Shoot Na**

A square root transformations for Grain Na was necessary in order to meet model assumptions. There is a significant two-way interaction between Allele and Treatment. Therefore, the response differs depending on both the allele and treatment.

*Anova Table: Shoot Na*

| Term                       | Df | Sum of Sq   | Wald statistic | Pr(Chisq) |
|----------------------------|----|-------------|----------------|-----------|
| Allele                     | 1  | 7056.94885  | 63.6587791     | 0.0000000 |
| Treatment                  | 2  | 44749.94004 | 403.6768024    | 0.0000000 |
| Allele:Haplotype           | 1  | 280.59661   | 2.5311842      | 0.1116164 |
| Allele:Treatment           | 2  | 2462.70965  | 22.2154209     | 0.0000150 |
| Allele:Haplotype:Treatment | 2  | 65.64216    | 0.5921397      | 0.7437355 |

*Back Transformed Predicted Values for Allele by Treatment: Shoot Na*

| Allele | Treatment   | Predicted value | Std error | Group* | Back transformed predicted value | Back transformed Std error |
|--------|-------------|-----------------|-----------|--------|----------------------------------|----------------------------|
| L      | Control     | 21.77           | 2.721     | a      | 473.93                           | 118.47                     |
| L      | 150 mM NaCl | 57.01           | 2.924     | b      | 3250.14                          | 333.39                     |
| L      | 250 mM NaCl | 77.64           | 2.935     | c      | 6027.97                          | 455.75                     |
| P      | Control     | 21.51           | 4.298     | a      | 462.68                           | 184.90                     |
| P      | 150 mM NaCl | 87.44           | 3.980     | c      | 7645.75                          | 696.02                     |

|   |                |        |       |   |          |        |
|---|----------------|--------|-------|---|----------|--------|
| P | 250 mM<br>NaCl | 104.56 | 3.980 | d | 10932.79 | 832.30 |
|---|----------------|--------|-------|---|----------|--------|

*\*predicted mean values on transformed scale compared with bonferonni corrected LSD*
