# Supplementary material for: Barley sodium content is regulated by natural variants of the Na+ transporter HvHKT1;5
Source: PubMed Central journal article supplement (PMC7244711; doi:10.1038/s42003-020-0990-5), 2020-05-22
Supplement: 42003_2020_990_MOESM2_ESM.pdf [file 42003_2020_990_MOESM2_ESM.pdf]

## Description of additional supplementary items

All 5 supplementary data files are included in the Excel file.

- Supplementary Data 1:** Elite 2-row spring cultivars included in GWAS and sequenced for *HvHKT1;5*
- Supplementary Data 2:** Gene models in region identified on 4H as being significantly associated with grain Na<sup>+</sup> content
- Supplementary Data 3:** *H. spontaneum* and *H. vulgare* landrace *HvHKT1;5* genotypic data
- Supplementary Data 4:** Primers used for Sanger sequencing, qPCR and In-situ.
- Supplementary Data 5:** Na<sup>+</sup> contents of 5th leaf material from 0mM, 150mM and 250mM NaCl treated plants.
